# Supplementary material for: Four-component synthesis of 3-aminomethylated imidazoheterocycles in EtOH under catalyst-free, oxidant-free and mild conditions
Source: Royal Society of Chemistry journal article supplement (doi:10.1039/d1gc01017d), 2021-01-01

# **Four-Component Synthesis of 3-Aminomethylated Imidazoheterocycles in EtOH under Catalyst-, Oxidant-Free and Mild Conditions**

Qing-Wen Gui<sup>a</sup>, Bin-Bin Wang<sup>a</sup>, Sha Zhu<sup>a</sup>, Fu-Long Li<sup>a</sup>, Meng-Xue Zhu<sup>a</sup>, Min Yi<sup>a</sup>, Jia-Ling Yu<sup>a</sup>, Zhi-Lin Wu<sup>b</sup>, Wei-Min He<sup>b\*</sup>

<sup>a</sup>College of Chemistry and Materials Science, Hunan Agricultural University, Changsha 410128, China

<sup>b</sup>School of Chemistry and Chemical Engineering, University of South China, Hengyang, 421001, China

E-mail: weiminhe2016@yeah.net

## **Table of Content:**

|                                                                         |            |
|-------------------------------------------------------------------------|------------|
| <b>1. General Information.....</b>                                      | <b>S2</b>  |
| <b>2. Experimental Section.....</b>                                     | <b>S2</b>  |
| <b>3. Characterization data of products.....</b>                        | <b>S3</b>  |
| <b>4. <sup>1</sup>H and <sup>13</sup>C NMR spectra of products.....</b> | <b>S18</b> |

## 1. General Information

All reactions were carried out in anhydrous solvent and commercially available reagents were used as received unless otherwise stated. Analytical thin layer chromatography (TLC) was performed on precoated aluminum-backed silica gel 60 F<sub>254</sub> plates (EMD Millipore, 200  $\mu$ m thickness). TLC plates were visualized with ultraviolet light and treatment with KMnO<sub>4</sub> or vanillin stains followed by heating. Flash column chromatography was performed using Tsingdao silica gel (200-300). <sup>1</sup>H and <sup>13</sup>C NMR spectras were recorded on a Bruker Avance DRX-600 spectrometers; chemical shifts ( $\delta$ ) are given in ppm and calibrated using the signal of residual undeuterated solvent as internal reference (CHCl<sub>3</sub>:  $\delta_{\text{H}}$  = 7.26 ppm and  $\delta_{\text{C}}$  = 77.00 ppm). Data for <sup>1</sup>H NMR and <sup>13</sup>C NMR are reported as follows: chemical shift ( $\delta$ , ppm), multiplicity, integration, and coupling constant (Hz).

## 2. Experimental Section

General experimental procedures for compound **5**

A mixture of 2-aminopyridine or 2-aminothiazole (**1**, 1 mmol),  $\alpha$ -holemethyl ketones (**2**, 1 mmol), amines (**3**, 1 mmol) and dichloromethane (**4**, 1 mmol) in 1.0 mL EtOH was put into a Schlenk tube at room temperature under magnetic stirring for 1 h. After the reaction was completed, the solvent was removed under reduced pressure and the residue was purified by column chromatography (petroleum ether /EtOAc, 2:1) to gain the desired compound **5**.

### 3. Characterization data of products

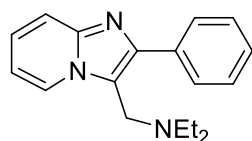

**5aaa**, *N-ethyl-N-((2-phenylimidazo[1,2-a]pyridin-3-yl)methyl)ethanamine*

**<sup>1</sup>H NMR** (400 MHz, CDCl<sub>3</sub>) δ 8.51 (d, *J* = 6.8Hz, 1H), 7.77 (d, *J* = 7.2Hz, 2H), 7.62 (d, *J* = 9.2Hz, 1H), 7.44 (t, *J* = 7.4Hz, 2H), 7.35 (t, *J* = 7.4Hz, 1H), 7.20-7.16 (m, 1H), 6.77 (t, *J* = 7.2Hz, 1H), 4.03 (s, 2H), 2.49 (q, *J* = 7.2Hz, 4H), 0.97 (t, *J* = 7.2Hz, 6H);

**<sup>13</sup>C NMR** (101 MHz, CDCl<sub>3</sub>) δ 144.9, 144.7, 134.6, 128.8, 128.3, 127.5, 125.7, 124.3, 117.4, 117.0, 111.5, 47.4, 46.4, 11.6.

**HRMS** (ESI<sup>+</sup>): calcd for C<sub>18</sub>H<sub>22</sub>N<sub>3</sub> [M+H]<sup>+</sup>: 280.1808, found: 280.1816.

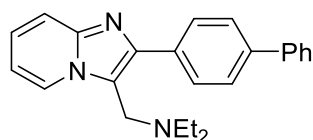

**5aba**, *N-((2-([1,1'-biphenyl]-4-yl)imidazo[1,2-a]pyridin-3-yl)methyl)-N-ethylethanamine*

**<sup>1</sup>H NMR** (400 MHz, CDCl<sub>3</sub>) δ 8.53 (d, *J* = 6.8Hz, 1H), 7.88 (d, *J* = 8.0Hz, 2H), 7.72-7.63 (m, 5H), 7.45 (t, *J* = 7.6Hz, 2H), 7.35 (t, *J* = 8.0Hz, 1H), 7.23-7.19 (m, 1H), 6.80 (t, *J* = 6.8Hz, 1H), 4.10 (s, 2H), 2.54 (q, *J* = 7.2Hz, 4H), 1.01 (t, *J* = 7.2Hz, 6H);

**<sup>13</sup>C NMR** (101 MHz, CDCl<sub>3</sub>) δ 145.0, 144.3, 140.7, 140.2, 133.7, 129.2, 128.7, 127.3, 127.0, 127.0, 125.7, 124.4, 117.6, 117.0, 111.5, 47.5, 46.5, 11.7.

**HRMS** (ESI<sup>+</sup>): calcd for C<sub>24</sub>H<sub>26</sub>N<sub>3</sub> [M+H]<sup>+</sup>: 356.2121, found: 356.2128.

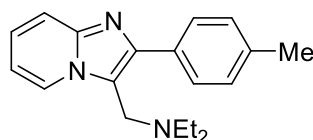

**5aca**, *N-ethyl-N-((2-(p-tolyl)imidazo[1,2-a]pyridin-3-yl)methyl)ethanamine*

**<sup>1</sup>H NMR** (400 MHz, CDCl<sub>3</sub>) δ 8.50 (d, *J* = 7.2Hz, 1H), 7.67 (d, *J* = 7.6Hz, 2H), 7.62 (d, *J* = 9.2Hz, 1H), 7.26 (d, *J* = 7.2Hz, 2H), 7.17 (t, *J* = 7.8Hz, 1H), 6.76 (t, *J* = 6.6Hz, 1H), 4.03 (s, 2H), 2.50 (q, *J* = 7.2Hz, 4H), 2.40 (s, 3H), 0.97 (t, *J* = 7.2Hz, 6H);

**<sup>13</sup>C NMR** (101 MHz, CDCl<sub>3</sub>) δ 144.7, 144.6, 137.0, 131.7, 128.9, 128.6, 125.5, 123.9, 117.1, 116.8, 111.2, 47.4, 46.3, 21.1, 11.5.

**HRMS** (ESI<sup>+</sup>): calcd for C<sub>19</sub>H<sub>24</sub>N<sub>3</sub> [M+H]<sup>+</sup>: 294.1965, found: 294.1974.

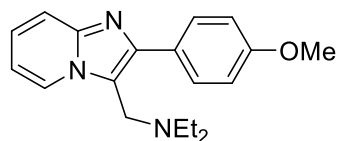

**5ada**, *N*-ethyl-*N*-((2-(4-methoxyphenyl)imidazo[1,2-*a*]pyridin-3-yl)methyl)ethanamine

**<sup>1</sup>H NMR** (400 MHz, CDCl<sub>3</sub>) δ 8.46 (d, *J* = 6.8Hz, 1H), 7.69 (d, *J* = 8.4Hz, 2H), 7.58 (d, *J* = 9.2Hz, 1H), 7.15 (t, *J* = 8.4Hz, 1H), 6.96 (d, *J* = 8.8Hz, 2H), 6.75 (t, *J* = 7.2Hz, 1H), 4.00 (s, 2H), 3.83 (s, 3H), 2.48 (q, *J* = 7.2Hz, 4H), 0.96 (t, *J* = 7.0Hz, 6H);

**<sup>13</sup>C NMR** (101 MHz, CDCl<sub>3</sub>) δ 159.1, 144.7, 144.5, 129.9, 127.2, 125.5, 124.0, 116.9, 116.7, 113.7, 111.2, 55.1, 47.4, 46.3, 11.5.

**HRMS** (ESI<sup>+</sup>): calcd for C<sub>19</sub>H<sub>24</sub>N<sub>3</sub>O [M+H]<sup>+</sup>: 310.1914, found: 310.1924.

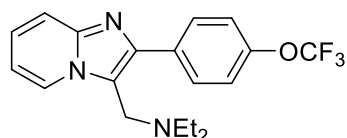

**5aea**, *N*-ethyl-*N*-((2-(4-(trifluoromethoxy)phenyl)imidazo[1,2-*a*]pyridin-3-yl)methyl)ethanamine

**<sup>1</sup>H NMR** (400 MHz, CDCl<sub>3</sub>) δ 8.50 (d, *J* = 6.8Hz, 1H), 7.84 (d, *J* = 8.4Hz, 2H), 7.62 (d, *J* = 8.8Hz, 1H), 7.30 (d, *J* = 8.4Hz, 2H), 7.21 (t, *J* = 7.8Hz, 1H), 6.80 (t, *J* = 6.6Hz, 1H), 4.02 (s, 2H), 2.51 (q, *J* = 7.2Hz, 4H), 0.99 (t, *J* = 7.2Hz, 6H);

**<sup>13</sup>C NMR** (101 MHz, CDCl<sub>3</sub>) δ 148.6 (d, *J* = 1.7Hz), 144.9, 143.3, 133.4, 130.1, 125.6, 124.6, 121.7, 120.8, 119.2, 117.4 (d, *J* = 73.8Hz), 111.7, 47.3, 46.4, 11.5.

**HRMS** (ESI<sup>+</sup>): calcd for C<sub>19</sub>H<sub>21</sub>F<sub>3</sub>N<sub>3</sub>O [M+H]<sup>+</sup>: 364.1631, found: 364.1638.

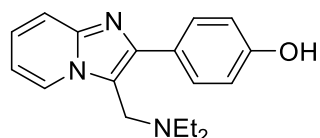

**5afa**, 4-(3-((diethylamino)methyl)imidazo[1,2-*a*]pyridin-2-yl)phenol

**<sup>1</sup>H NMR** (400 MHz, CDCl<sub>3</sub>) δ 8.53 (d, *J* = 6.8Hz, 1H), 7.64 (d, *J* = 9.2Hz, 2H), 7.47 (d, *J* = 8.4Hz, 1H), 7.19 (t, *J* = 8.0Hz, 1H), 6.84-6.78 (m, 3H), 4.00 (s, 2H), 2.49 (q, *J* = 7.2Hz, 4H), 0.97 (t, *J* = 7.0Hz, 6H);

**<sup>13</sup>C NMR** (101 MHz, CDCl<sub>3</sub>) δ 158.0, 144.4, 144.4, 130.1, 125.7, 124.8, 124.0, 116.7, 116.1, 115.9,

111.8, 47.2, 46.4, 11.5.

**HRMS** (ESI<sup>+</sup>): calcd for C<sub>18</sub>H<sub>22</sub>N<sub>3</sub>O [M+H]<sup>+</sup>: 296.1757, found: 296.1765.

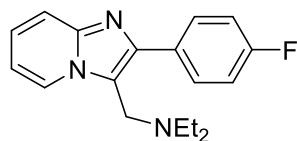

**5aga**, *N-ethyl-N-((2-(4-fluorophenyl)imidazo[1,2-a]pyridin-3-yl)methyl)ethanamine*

<sup>1</sup>H NMR (400 MHz, CDCl<sub>3</sub>) δ 8.50 (d, *J* = 6.8Hz, 1H), 7.76-7.72 (m, 2H), 7.61 (d, *J* = 9.2Hz, 1H), 7.20 (t, *J* = 7.8Hz, 1H), 7.13 (t, *J* = 8.6Hz, 2H), 6.80 (t, *J* = 7.2Hz, 1H), 4.02 (s, 2H), 2.50 (q, *J* = 7.2Hz, 4H), 0.97 (t, *J* = 7.0Hz, 6H);

<sup>13</sup>C NMR (101 MHz, CDCl<sub>3</sub>) δ 163.7, 161.3, 144.9, 143.9, 130.7 (d, *J* = 3.1Hz), 130.5 (d, *J* = 8.2Hz), 125.6, 124.6, 117.0 (d, *J* = 16.8Hz), 115.3 (d, *J* = 21.5Hz), 111.7, 47.2, 46.4, 11.5.

**HRMS** (ESI<sup>+</sup>): calcd for C<sub>18</sub>H<sub>21</sub>FN<sub>3</sub> [M+H]<sup>+</sup>: 298.1714, found: 298.1720.

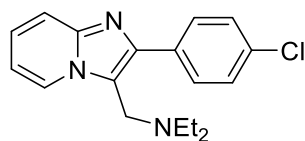

**5aha**, *N-((2-(4-chlorophenyl)imidazo[1,2-a]pyridin-3-yl)methyl)-N-ethylethanamine*

<sup>1</sup>H NMR (400 MHz, CDCl<sub>3</sub>) δ 8.50 (d, *J* = 6.8Hz, 1H), 7.73 (d, *J* = 8.4Hz, 2H), 7.61 (d, *J* = 9.2Hz, 1H), 7.42 (d, *J* = 8.4Hz, 2H), 7.21 (t, *J* = 7.8Hz, 1H), 6.80 (t, *J* = 6.8Hz, 1H), 4.01 (s, 2H), 2.50 (q, *J* = 7.2Hz, 4H), 0.98 (t, *J* = 7.0Hz, 6H);

<sup>13</sup>C NMR (101 MHz, CDCl<sub>3</sub>) δ 145.0, 143.6, 133.6, 133.2, 130.1, 128.6, 125.7, 124.6, 117.6, 117.1, 111.7, 47.3, 46.4, 11.6.

**HRMS** (ESI<sup>+</sup>): calcd for C<sub>18</sub>H<sub>21</sub>ClN<sub>3</sub> [M+H]<sup>+</sup>: 314.1419, found: 314.1428.

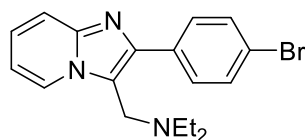

**5aia**, *N-((2-(4-bromophenyl)imidazo[1,2-a]pyridin-3-yl)methyl)-N-ethylethanamine*

<sup>1</sup>H NMR (400 MHz, CDCl<sub>3</sub>) δ 8.47 (d, *J* = 6.8Hz, 1H), 7.66 (d, *J* = 8.4Hz, 2H), 7.59 (d, *J* = 9.2Hz, 1H), 7.55 (d, *J* = 8.4Hz, 2H), 7.19 (t, *J* = 7.8Hz, 1H), 6.72 (t, *J* = 6.8Hz, 1H), 3.98 (s, 2H), 2.47 (q, *J* = 7.2Hz, 4H), 0.96 (t, *J* = 7.0Hz, 6H);

<sup>13</sup>C NMR (101 MHz, CDCl<sub>3</sub>) δ 144.9, 143.5, 133.6, 131.5, 130.4, 125.6, 124.6, 121.7, 117.6, 117.0, 111.7, 47.3, 46.4, 11.6.

HRMS (ESI<sup>+</sup>): calcd for C<sub>18</sub>H<sub>21</sub>BrN<sub>3</sub> [M+H]<sup>+</sup>: 358.0913, found: 358.0919.

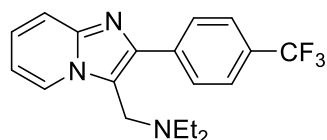

**5aja**, *N*-ethyl-*N*-((2-(4-(trifluoromethyl)phenyl)imidazo[1,2-*a*]pyridin-3-yl)methyl)ethanamine

<sup>1</sup>H NMR (400 MHz, CDCl<sub>3</sub>) δ 8.51 (d, *J* = 6.8Hz, 1H), 7.92 (d, *J* = 8.0Hz, 2H), 7.69 (d, *J* = 8.4Hz, 2H), 7.62 (d, *J* = 8.8Hz, 1H), 7.21 (t, *J* = 8.4Hz, 1H), 6.81 (t, *J* = 6.8Hz, 1H), 4.03 (s, 2H), 2.50 (q, *J* = 7.2Hz, 4H), 0.98 (t, *J* = 7.2Hz, 6H);

<sup>13</sup>C NMR (101 MHz, CDCl<sub>3</sub>) δ 145.1, 143.2, 138.4, 129.4 (d, *J* = 32.7Hz), 129.0, 125.6 (d, *J* = 6.0Hz), 125.2 (q, *J* = 5.6Hz), 124.8, 122.9, 118.4, 117.2, 111.8, 47.4, 46.5, 11.6.

HRMS (ESI<sup>+</sup>): calcd for C<sub>19</sub>H<sub>21</sub>F<sub>3</sub>N<sub>3</sub> [M+H]<sup>+</sup>: 348.1682, found: 348.1690.

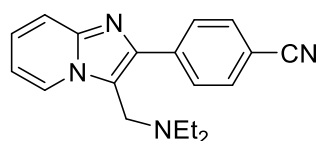

**5aka**, 4-(3-((diethylamino)methyl)imidazo[1,2-*a*]pyridin-2-yl)benzonitrile

<sup>1</sup>H NMR (400 MHz, CDCl<sub>3</sub>) δ 8.48 (d, *J* = 7.2Hz, 1H), 7.94 (d, *J* = 8.0Hz, 2H), 7.71-7.67 (m, 2H), 7.60 (d, *J* = 9.2Hz, 1H), 7.22 (t, *J* = 7.8Hz, 1H), 6.82 (t, *J* = 6.8Hz, 1H), 4.00 (s, 2H), 2.48 (q, *J* = 7.2Hz, 4H), 0.97 (t, *J* = 7.0Hz, 6H);

<sup>13</sup>C NMR (101 MHz, CDCl<sub>3</sub>) δ 145.1, 142.5, 139.4, 132.0, 129.1, 126.2, 125.6, 124.9, 118.8, 117.2, 112.0, 110.8, 47.4, 46.4, 11.6.

HRMS (ESI<sup>+</sup>): calcd for C<sub>19</sub>H<sub>21</sub>N<sub>4</sub> [M+H]<sup>+</sup>: 305.1761, found: 305.1768.

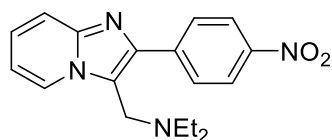

**5ala**, *N*-ethyl-*N*-((2-(4-nitrophenyl)imidazo[1,2-*a*]pyridin-3-yl)methyl)ethanamine

<sup>1</sup>H NMR (400 MHz, CDCl<sub>3</sub>) δ 8.56 (d, *J* = 6.4Hz, 1H), 8.33 (d, *J* = 8.4Hz, 2H), 8.05 (d, *J* = 8.4Hz, 2H), 7.66 (d, *J* = 9.2Hz, 1H), 7.28 (t, *J* = 7.8Hz, 1H), 6.89 (t, *J* = 6.8Hz, 1H), 4.10 (s, 2H), 2.56 (q,

$J = 7.2\text{Hz}$ , 4H), 1.03 (t,  $J = 7.2\text{Hz}$ , 6H);

$^{13}\text{C NMR}$  (101 MHz,  $\text{CDCl}_3$ )  $\delta$  147.0, 145.3, 142.3, 141.4, 129.3, 125.7, 125.2, 123.7, 119.3, 117.4, 112.2, 47.5, 46.5, 11.6.

**HRMS** ( $\text{ESI}^+$ ): calcd for  $\text{C}_{18}\text{H}_{21}\text{N}_4\text{O}_2$   $[\text{M}+\text{H}]^+$ : 325.1659, found: 325.1665.

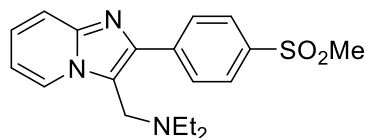

**5ama**, *N-ethyl-N-((2-(4-(methylsulfonyl)phenyl)imidazo[1,2-a]pyridin-3-yl)methyl)ethanamine*

$^1\text{H NMR}$  (400 MHz,  $\text{CDCl}_3$ )  $\delta$  8.49 (d,  $J = 6.8\text{Hz}$ , 1H), 8.01 (dd,  $J_1 = 18.4\text{Hz}$ ,  $J_2 = 8.4\text{Hz}$ , 4H), 7.60 (d,  $J = 9.2\text{Hz}$ , 1H), 7.22 (t,  $J = 7.8\text{Hz}$ , 1H), 6.81 (t,  $J = 6.8\text{Hz}$ , 1H), 6.89 (t,  $J = 6.8\text{Hz}$ , 1H), 4.02 (s, 2H), 3.07 (s, 3H), 2.48 (q,  $J = 7.2\text{Hz}$ , 4H), 0.97 (t,  $J = 7.0\text{Hz}$ , 6H);

$^{13}\text{C NMR}$  (101 MHz,  $\text{CDCl}_3$ )  $\delta$  145.1, 142.4, 140.3, 139.1, 129.4, 127.3, 125.6, 125.0, 118.9, 117.2, 112.0, 47.3, 46.4, 44.5, 11.6.

**HRMS** ( $\text{ESI}^+$ ): calcd for  $\text{C}_{19}\text{H}_{24}\text{N}_3\text{O}_2\text{S}$   $[\text{M}+\text{H}]^+$ : 358.1584, found: 358.1588.

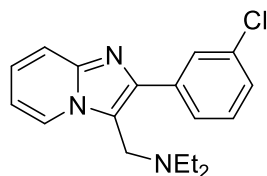

**5ana**, *N-((2-(3-chlorophenyl)imidazo[1,2-a]pyridin-3-yl)methyl)-N-ethylethanamine*

$^1\text{H NMR}$  (400 MHz,  $\text{CDCl}_3$ )  $\delta$  8.47 (d,  $J = 7.6\text{Hz}$ , 1H), 7.84 (s, 1H), 7.66 (dd,  $J_1 = 7.6\text{Hz}$ ,  $J_2 = 1.2\text{Hz}$ , 1H), 7.59 (dd,  $J_1 = 8.8\text{Hz}$ ,  $J_2 = 0.8\text{Hz}$ , 1H), 7.37-7.29 (m, 2H), 7.19 (t,  $J = 8.0\text{Hz}$ , 1H), 6.78 (t,  $J = 6.8\text{Hz}$ , 1H), 4.00 (s, 2H), 2.49 (q,  $J = 7.2\text{Hz}$ , 4H), 0.97 (t,  $J = 7.0\text{Hz}$ , 6H);

$^{13}\text{C NMR}$  (101 MHz,  $\text{CDCl}_3$ )  $\delta$  144.9, 143.3, 136.5, 134.2, 129.5, 128.8, 127.5, 126.8, 125.6, 124.6, 117.9, 117.1, 111.7, 47.2, 46.4, 11.6.

**HRMS** ( $\text{ESI}^+$ ): calcd for  $\text{C}_{18}\text{H}_{21}\text{ClN}_3$   $[\text{M}+\text{H}]^+$ : 314.1419, found: 314.1426.

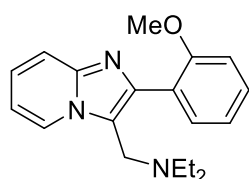

**5a0a**, *N*-ethyl-*N*-((2-(2-methoxyphenyl)imidazo[1,2-*a*]pyridin-3-yl)methyl)ethanamine

**<sup>1</sup>H NMR** (400 MHz, CDCl<sub>3</sub>) δ 8.55 (d, *J* = 6.8 Hz, 1H), 7.60 (d, *J* = 9.2 Hz, 1H), 7.45 (dd, *J*<sub>1</sub> = 7.2 Hz, *J*<sub>2</sub> = 1.2 Hz, 1H), 7.36 (t, *J* = 7.8 Hz, 1H), 7.16 (t, *J* = 7.8 Hz, 1H), 7.03 (t, *J* = 7.2 Hz, 1H), 6.97 (d, *J* = 8.4 Hz, 1H), 6.77 (t, *J* = 6.4 Hz, 1H), 3.83 (s, 2H), 3.78 (s, 3H), 2.42 (q, *J* = 7.2 Hz, 4H), 0.91 (t, *J* = 7.2 Hz, 6H);

**<sup>13</sup>C NMR** (101 MHz, CDCl<sub>3</sub>) δ 157.1, 145.0, 141.7, 132.2, 129.4, 125.8, 123.8, 123.7, 120.5, 118.8, 117.1, 111.3, 110.9, 55.4, 47.3, 46.3, 11.4.

**HRMS** (ESI<sup>+</sup>): calcd for C<sub>19</sub>H<sub>24</sub>N<sub>3</sub>O [M+H]<sup>+</sup>: 310.1914, found: 310.1920.

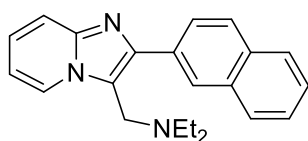

**5a0a**, *N*-ethyl-*N*-((2-(naphthalen-2-yl)imidazo[1,2-*a*]pyridin-3-yl)methyl)ethanamine

**<sup>1</sup>H NMR** (400 MHz, CDCl<sub>3</sub>) δ 8.52 (d, *J* = 6.8 Hz, 1H), 8.27 (s, 1H), 7.98-7.85 (m, 4H), 7.67 (d, *J* = 9.2 Hz, 1H), 7.49-7.47 (m, 2H), 7.22-7.18 (m, 1H), 6.79 (td, *J*<sub>1</sub> = 6.8 Hz, *J*<sub>2</sub> = 0.8 Hz, 1H), 4.10 (s, 2H), 2.52 (q, *J* = 7.2 Hz, 4H), 0.98 (t, *J* = 7.2 Hz, 6H);

**<sup>13</sup>C NMR** (101 MHz, CDCl<sub>3</sub>) δ 133.3, 132.6, 132.0, 128.1, 127.9, 127.7, 127.5, 126.8, 126.0, 125.9, 125.6, 124.4, 177.8, 116.9, 111.5, 47.3, 46.3, 11.5.

**HRMS** (ESI<sup>+</sup>): calcd for C<sub>22</sub>H<sub>24</sub>N<sub>3</sub> [M+H]<sup>+</sup>: 330.1965, found: 330.1970.

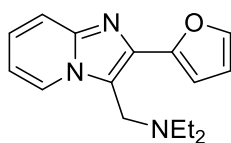

**5aqa**, *N*-ethyl-*N*-((2-(furan-2-yl)imidazo[1,2-*a*]pyridin-3-yl)methyl)ethanamine

**<sup>1</sup>H NMR** (400 MHz, CDCl<sub>3</sub>) δ 8.45 (d, *J* = 6.8 Hz, 1H), 7.58 (d, *J* = 8.8 Hz, 1H), 7.51 (s, 1H), 7.21-7.17 (m, 1H), 6.91 (d, *J* = 3.2 Hz, 1H), 7.78 (d, *J* = 6.6 Hz, 1H), 6.52-6.51 (m, 1H), 4.19 (s, 2H), 2.56 (q, *J* = 7.2 Hz, 4H), 1.03 (t, *J* = 7.2 Hz, 6H);

**<sup>13</sup>C NMR** (101 MHz, CDCl<sub>3</sub>) δ 150.3, 145.5, 142.1, 135.9, 125.9, 125.0, 117.5, 117.0, 111.9, 111.5, 108.1, 47.2, 46.6, 11.7.

**HRMS** (ESI<sup>+</sup>): calcd for C<sub>16</sub>H<sub>20</sub>N<sub>3</sub>O [M+H]<sup>+</sup>: 270.1601, found: 270.1608.



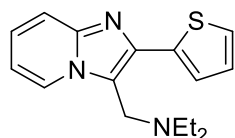

**5ara**, *N*-ethyl-*N*-((2-(thiophen-2-yl)imidazo[1,2-*a*]pyridin-3-yl)methyl)ethanamine

**<sup>1</sup>H NMR** (400 MHz, CDCl<sub>3</sub>) δ 8.44 (d, *J* = 6.8Hz, 1H), 7.59 (d, *J* = 9.2Hz, 1H), 7.51 (d, *J* = 4.8Hz, 1H), 7.33 (d, *J* = 4.4Hz, 1H), 7.20-7.16 (m, 1H), 7.12-7.10 (m, 1H), 6.77 (t, *J* = 6.8Hz, 1H), 4.11 (s, 2H), 2.56 (q, *J* = 7.2Hz, 4H), 1.02 (t, *J* = 7.0Hz, 6H);

**<sup>13</sup>C NMR** (101 MHz, CDCl<sub>3</sub>) δ 144.9, 138.9, 137.5, 127.4, 125.5, 125.4, 125.3, 124.7, 116.8, 111.7, 47.6, 46.5, 11.7.

**HRMS** (ESI<sup>+</sup>): calcd for C<sub>16</sub>H<sub>20</sub>N<sub>3</sub>S [M+H]<sup>+</sup>: 286.1372, found: 286.1378.

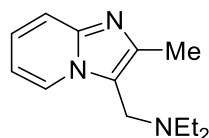

**5asa**, *N*-ethyl-*N*-((2-methylimidazo[1,2-*a*]pyridin-3-yl)methyl)ethanamine

**<sup>1</sup>H NMR** (400 MHz, CDCl<sub>3</sub>) δ 8.29 (d, *J* = 6.8Hz, 1H), 7.48 (d, *J* = 9.2Hz, 1H), 7.11 (t, *J* = 8.0Hz, 1H), 6.72 (t, *J* = 6.6Hz, 1H), 3.78 (s, 2H), 2.48 (q, *J* = 7.2Hz, 4H), 2.41 (s, 3H), 1.00 (t, *J* = 7.2Hz, 6H);

**<sup>13</sup>C NMR** (101 MHz, CDCl<sub>3</sub>) δ 144.3, 141.2, 124.9, 124.0, 116.8, 116.1, 111.3, 46.6, 46.2, 13.2, 11.3.

**HRMS** (ESI<sup>+</sup>): calcd for C<sub>13</sub>H<sub>20</sub>N<sub>3</sub> [M+H]<sup>+</sup>: 218.1652, found: 218.1659.

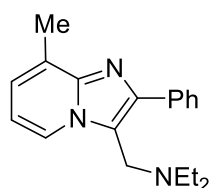

**5baa**, *N*-ethyl-*N*-((8-methyl-2-phenylimidazo[1,2-*a*]pyridin-3-yl)methyl)ethanamine

**<sup>1</sup>H NMR** (400 MHz, CDCl<sub>3</sub>) δ 8.39 (d, *J* = 6.8Hz, 1H), 7.75 (d, *J* = 7.2Hz, 2H), 7.44 (t, *J* = 7.6Hz, 2H), 7.35 (t, *J* = 7.4Hz, 1H), 6.98 (d, *J* = 6.8Hz, 1H), 6.71 (t, *J* = 6.8Hz, 1H), 4.01 (s, 2H), 2.66 (s, 3H), 2.49 (q, *J* = 7.2Hz, 4H), 0.96 (t, *J* = 7.2Hz, 6H);

**<sup>13</sup>C NMR** (101 MHz, CDCl<sub>3</sub>) δ 145.3, 144.4, 134.9, 129.1, 128.3, 127.4, 126.8, 123.5, 123.2, 117.8, 111.6, 47.3, 46.4, 17.1, 11.5.

**HRMS** (ESI<sup>+</sup>): calcd for C<sub>19</sub>H<sub>24</sub>N<sub>3</sub> [M+H]<sup>+</sup>: 294.1965, found:294.1970.

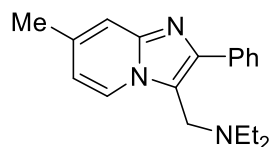

**5caa**, *N*-ethyl-*N*-((7-methyl-2-phenylimidazo[1,2-*a*]pyridin-3-yl)methyl)ethanamine

**<sup>1</sup>H NMR** (400 MHz, CDCl<sub>3</sub>) δ 8.40 (d, *J* = 7.2Hz, 1H), 7.75 (d, *J* = 7.6Hz, 2H), 7.43 (t, *J* = 7.6Hz, 2H), 7.39-7.34 (m, 2H), 6.62 (d, *J* = 7.2Hz, 1H), 4.03 (s, 2H), 2.50 (q, *J* = 7.2Hz, 4H), 2.40 (s, 3H), 0.97 (t, *J* = 7.2Hz, 6H);

**<sup>13</sup>C NMR** (101 MHz, CDCl<sub>3</sub>) δ 145.3, 144.3, 135.5, 134.6, 128.8, 128.3, 127.5, 124.9, 116.7, 115.3, 114.3, 47.3, 46.3, 21.3, 11.5.

**HRMS** (ESI<sup>+</sup>): calcd for C<sub>19</sub>H<sub>24</sub>N<sub>3</sub> [M+H]<sup>+</sup>: 294.1965, found: 294.1968.

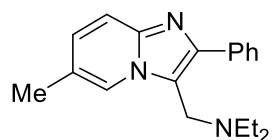

**5daa**, *N*-ethyl-*N*-((6-methyl-2-phenylimidazo[1,2-*a*]pyridin-3-yl)methyl)ethanamine

**<sup>1</sup>H NMR** (400 MHz, CDCl<sub>3</sub>) δ 8.27 (s, 1H), 7.75 (d, *J* = 7.2Hz, 2H), 7.53 (d, *J* = 9.2Hz, 1H), 7.44 (t, *J* = 7.6Hz, 2H), 7.34 (t, *J* = 7.4Hz, 1H), 7.05 (d, *J* = 8.4Hz, 1H), 4.03 (s, 2H), 2.52 (q, *J* = 7.2Hz, 4H), 2.35 (s, 3H), 0.98 (t, *J* = 7.0Hz, 6H);

**<sup>13</sup>C NMR** (101 MHz, CDCl<sub>3</sub>) δ 144.6, 144.0, 134.7, 128.8, 128.3, 127.6, 127.5, 123.2, 121.1, 117.0, 116.3, 47.2, 46.4, 18.5, 11.5.

**HRMS** (ESI<sup>+</sup>): calcd for C<sub>19</sub>H<sub>24</sub>N<sub>3</sub> [M+H]<sup>+</sup>: 294.1965, found: 294.1972.

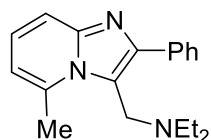

**5eaa**, *N*-ethyl-*N*-((5-methyl-2-phenylimidazo[1,2-*a*]pyridin-3-yl)methyl)ethanamine

**<sup>1</sup>H NMR** (400 MHz, CDCl<sub>3</sub>) δ 7.61 (d, *J* = 7.2Hz, 2H), 7.49-7.41 (m, 3H), 7.36 (t, *J* = 7.2Hz, 1H), 7.08 (t, *J* = 7.8Hz, 1H), 6.51 (d, *J* = 6.8Hz, 1H), 4.04 (s, 2H), 3.09 (s, 3H), 2.34 (q, *J* = 7.2Hz, 4H), 0.72 (t, *J* = 7.2Hz, 6H);

**<sup>13</sup>C NMR** (101 MHz, CDCl<sub>3</sub>) δ 147.7, 146.9, 138.0, 135.3, 129.9, 128.2, 127.5, 124.8, 119.3, 115.2,

113.0, 48.0, 44.5, 19.6, 10.6.

**HRMS** (ESI<sup>+</sup>): calcd for C<sub>19</sub>H<sub>24</sub>N<sub>3</sub> [M+H]<sup>+</sup>: 294.1965, found: 294.1972.

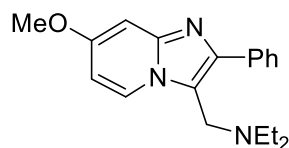

**5faa**, *N-ethyl-N-((7-methoxy-2-phenylimidazo[1,2-a]pyridin-3-yl)methyl)ethanamine*

**<sup>1</sup>H NMR** (400 MHz, CDCl<sub>3</sub>) δ 8.14 (d, *J* = 6.8Hz, 1H), 7.79 (d, *J* = 9.2Hz, 2H), 7.41 (t, *J* = 7.6Hz, 2H), 7.32 (t, *J* = 7.4Hz, 1H), 6.69 (t, *J* = 7.2Hz, 1H), 6.48 (d, *J* = 7.6Hz, 1H), 4.00 (s, 5H), 2.49 (q, *J* = 7.2Hz, 4H), 0.95 (t, *J* = 7.0Hz, 6H);

**<sup>13</sup>C NMR** (101 MHz, CDCl<sub>3</sub>) δ 148.7, 144.0, 139.3, 134.6, 129.0, 128.1, 127.4, 118.5, 118.4, 111.3, 100.5, 55.6, 47.3, 46.4, 11.5.

**HRMS** (ESI<sup>+</sup>): calcd for C<sub>19</sub>H<sub>24</sub>N<sub>3</sub>O [M+H]<sup>+</sup>: 310.1914, found: 310.1920.

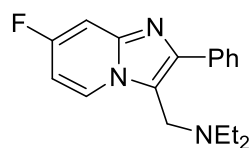

**5gaa**, *N-ethyl-N-((7-fluoro-2-phenylimidazo[1,2-a]pyridin-3-yl)methyl)ethanamine*

**<sup>1</sup>H NMR** (400 MHz, CDCl<sub>3</sub>) δ 8.54 (t, *J* = 6.6Hz, 1H), 7.72 (d, *J* = 7.2Hz, 2H), 7.44 (d, *J* = 7.4Hz, 2H), 7.35 (t, *J* = 7.4Hz, 1H), 7.26-7.22 (m, 1H), 6.67 (td, *J*<sub>1</sub> = 7.6Hz, *J*<sub>2</sub> = 2.4Hz, 1H), 4.03 (s, 2H), 2.50 (q, *J* = 7.2Hz, 4H), 0.97 (t, *J* = 7.2Hz, 6H);

**<sup>13</sup>C NMR** (101 MHz, CDCl<sub>3</sub>) δ 161.5, 159.0, 145.6, 145.0 (d, *J* = 13.6Hz), 134.4, 128.6 (d, *J* = 39.5Hz), 127.7, 127.3 (d, *J* = 10.3Hz), 117.3, 103.7 (d, *J* = 29.0Hz), 100.5 (d, *J* = 23.2Hz), 47.5, 46.4, 11.6.

**HRMS** (ESI<sup>+</sup>): calcd for C<sub>18</sub>H<sub>21</sub>FN<sub>3</sub> [M+H]<sup>+</sup>: 298.1714, found: 298.1722.

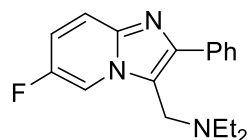

**5haa**, *N-ethyl-N-((6-fluoro-2-phenylimidazo[1,2-a]pyridin-3-yl)methyl)ethanamine*

**<sup>1</sup>H NMR** (400 MHz, CDCl<sub>3</sub>) δ 8.54 (dd, *J*<sub>1</sub> = 4.4Hz, *J*<sub>2</sub> = 2.4Hz, 1H), 7.73 (d, *J* = 7.2Hz, 2H), 7.58 (dd, *J*<sub>1</sub> = 9.6Hz, *J*<sub>2</sub> = 5.2Hz, 1H), 7.45 (t, *J* = 7.4Hz, 2H), 7.37 (t, *J* = 7.4Hz, 1H), 7.15-7.10 (m, 1H),

4.05 (s, 2H), 2.51 (q,  $J = 7.2\text{Hz}$ , 4H), 0.99 (t,  $J = 7.0\text{Hz}$ , 6H);

$^{13}\text{C}$  NMR (101 MHz,  $\text{CDCl}_3$ )  $\delta$  153.8, 151.4, 146.1, 142.6, 134.3, 128.6 (d,  $J = 35.9\text{Hz}$ ), 127.8, 118.8, 117.3 (d,  $J = 9.2\text{Hz}$ ), 116.3 (d,  $J = 25.9\text{Hz}$ ), 112.5 (d,  $J = 42.0\text{Hz}$ ), 47.5, 46.4, 11.5.

HRMS ( $\text{ESI}^+$ ): calcd for  $\text{C}_{18}\text{H}_{21}\text{FN}_3$   $[\text{M}+\text{H}]^+$ : 298.1714, found: 298.1718.

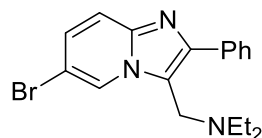

**5iaa**, *N-((6-bromo-2-phenylimidazo[1,2-a]pyridin-3-yl)methyl)-N-ethylethanamine*

$^1\text{H}$  NMR (400 MHz,  $\text{CDCl}_3$ )  $\delta$  8.64 (s, 1H), 7.65 (d,  $J = 7.2\text{Hz}$ , 2H), 7.42 (d,  $J = 9.6\text{Hz}$ , 1H), 7.36 (t,  $J = 7.4\text{Hz}$ , 2H), 7.28 (t,  $J = 7.2\text{Hz}$ , 1H), 7.18-7.15 (m, 1H), 3.95 (s, 2H), 2.42 (q,  $J = 7.2\text{Hz}$ , 4H), 0.90 (t,  $J = 7.0\text{Hz}$ , 6H);

$^{13}\text{C}$  NMR (101 MHz,  $\text{CDCl}_3$ )  $\delta$  145.5, 143.3, 134.2, 128.8, 128.4, 127.8, 127.6, 126.0, 117.9, 117.6, 106.1, 47.3, 46.4, 11.5.

HRMS ( $\text{ESI}^+$ ): calcd for  $\text{C}_{18}\text{H}_{21}\text{BrN}_3$   $[\text{M}+\text{H}]^+$ : 358.0913, found: 358.0919.

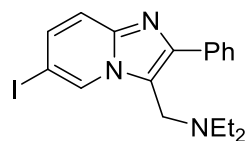

**5jaa**, *N-ethyl-N-((6-iodo-2-phenylimidazo[1,2-a]pyridin-3-yl)methyl)ethanamine*

$^1\text{H}$  NMR (400 MHz,  $\text{CDCl}_3$ )  $\delta$  8.83 (s, 1H), 7.73 (d,  $J = 8.4\text{Hz}$ , 2H), 7.45-7.39 (m, 3H), 7.37-7.32 (m, 2H), 4.01 (s, 2H), 2.49 (q,  $J = 7.2\text{Hz}$ , 4H), 0.97 (t,  $J = 7.2\text{Hz}$ , 6H);

$^{13}\text{C}$  NMR (101 MHz,  $\text{CDCl}_3$ )  $\delta$  145.0, 143.3, 134.1, 132.0, 130.9, 128.8, 128.4, 127.7, 118.0, 117.4, 74.2, 47.3, 46.4, 11.5.

HRMS ( $\text{ESI}^+$ ): calcd for  $\text{C}_{18}\text{H}_{21}\text{IN}_3$   $[\text{M}+\text{H}]^+$ : 406.0775, found: 406.0782.

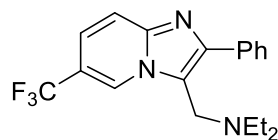

**5kaa**, *N-ethyl-N-((2-phenyl-6-(trifluoromethyl)imidazo[1,2-a]pyridin-3-yl)methyl)ethanamine*

$^1\text{H}$  NMR (400 MHz,  $\text{CDCl}_3$ )  $\delta$  9.06 (s, 1H), 7.74 (d,  $J = 7.2\text{Hz}$ , 2H), 7.69 (d,  $J = 9.6\text{Hz}$ , 1H), 7.46 (t,  $J = 7.6\text{Hz}$ , 2H), 7.38 (t,  $J = 6.8\text{Hz}$ , 1H), 7.33 (dd,  $J_1 = 9.6\text{Hz}$ ,  $J_2 = 2.0\text{Hz}$ , 1H), 4.10 (s, 2H), 2.51

(q,  $J = 7.2\text{Hz}$ , 4H), 0.99 (t,  $J = 7.0\text{Hz}$ , 6H);

$^{13}\text{C NMR}$  (101 MHz,  $\text{CDCl}_3$ )  $\delta$  146.4, 144.6, 133.9, 128.6 (d,  $J = 32.5\text{Hz}$ ), 128.0, 125.2 (q,  $J = 10.0\text{Hz}$ ), 122.5, 120.1 (d,  $J = 2.5\text{Hz}$ ), 118.8, 117.6, 115.6 (q,  $J = 51.0\text{Hz}$ ), 47.4, 46.5, 11.7.

**HRMS** ( $\text{ESI}^+$ ): calcd for  $\text{C}_{19}\text{H}_{21}\text{F}_3\text{N}_3$  [ $\text{M}+\text{H}$ ] $^+$ : 348.1682, found: 348.1688.

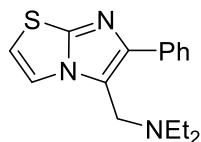

**5laa**, *N-ethyl-N-((6-phenylimidazo[2,1-b]thiazol-5-yl)methyl)ethanamine*

$^1\text{H NMR}$  (400 MHz,  $\text{CDCl}_3$ )  $\delta$  7.68 (d,  $J = 4.4\text{Hz}$ , 1H), 7.61 (d,  $J = 7.6\text{Hz}$ , 2H), 7.33 (t,  $J = 7.6\text{Hz}$ , 2H), 7.24-7.20 (m, 1H), 6.65 (d,  $J = 4.4\text{Hz}$ , 1H), 3.84 (s, 2H), 2.42 (q,  $J = 7.2\text{Hz}$ , 4H), 0.91 (t,  $J = 7.0\text{Hz}$ , 6H);

$^{13}\text{C NMR}$  (101 MHz,  $\text{CDCl}_3$ )  $\delta$  148.7, 145.1, 135.0, 128.3, 128.0, 127.0, 120.1, 119.4, 111.1, 48.1, 46.5, 11.7.

**HRMS** ( $\text{ESI}^+$ ): calcd for  $\text{C}_{16}\text{H}_{20}\text{N}_3\text{S}$  [ $\text{M}+\text{H}$ ] $^+$ : 286.1372, found: 286.1376.

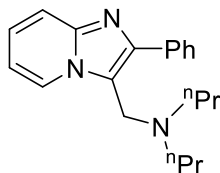

**5aab**, *N-((2-phenylimidazo[1,2-a]pyridin-3-yl)methyl)-N-propylpropan-1-amine*

$^1\text{H NMR}$  (400 MHz,  $\text{CDCl}_3$ )  $\delta$  8.49 (d,  $J = 6.8\text{Hz}$ , 1H), 7.77 (d,  $J = 8.4\text{Hz}$ , 2H), 7.62 (d,  $J = 9.2\text{Hz}$ , 1H), 7.44 (t,  $J = 7.6\text{Hz}$ , 2H), 7.35 (t,  $J = 7.4\text{Hz}$ , 1H), 7.20-7.16 (m, 1H), 6.77 (t,  $J = 6.8\text{Hz}$ , 1H), 4.04 (s, 2H), 2.37 (t,  $J = 7.4\text{Hz}$ , 4H), 1.46-1.37 (m, 4H), 0.76 (t,  $J = 7.4\text{Hz}$ , 6H);

$^{13}\text{C NMR}$  (101 MHz,  $\text{CDCl}_3$ )  $\delta$  144.8, 144.7, 134.6, 128.8, 128.3, 127.5, 125.6, 124.3, 117.5, 117.0, 111.4, 55.4, 48.5, 19.8, 11.8.

**HRMS** ( $\text{ESI}^+$ ): calcd for  $\text{C}_{20}\text{H}_{26}\text{N}_3$  [ $\text{M}+\text{H}$ ] $^+$ : 308.2121, found: 308.2126.

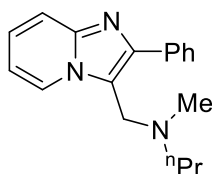

**5aac**, *N*-methyl-*N*-((2-phenylimidazo[1,2-*a*]pyridin-3-yl)methyl)propan-1-amine

**<sup>1</sup>H NMR** (400 MHz, CDCl<sub>3</sub>) δ 8.47 (d, *J* = 6.8Hz, 1H), 7.80 (d, *J* = 8.0Hz, 2H), 7.63 (d, *J* = 9.2Hz, 1H), 7.45 (t, *J* = 7.6Hz, 2H), 7.36 (t, *J* = 7.4Hz, 1H), 7.22-7.18 (m, 1H), 6.80 (t, *J* = 7.4Hz, 1H), 3.96 (s, 2H), 2.37 (t, *J* = 7.2Hz, 2H), 2.17 (s, 3H), 1.50 (q, *J* = 7.2Hz, 2H), 0.84 (t, *J* = 7.2Hz, 3H);

**<sup>13</sup>C NMR** (101 MHz, CDCl<sub>3</sub>) δ 144.9, 144.7, 134.6, 128.9, 128.4, 127.6, 125.6, 124.5, 117.3, 117.1, 111.7, 59.0, 51.6, 41.4, 20.4, 11.8.

**HRMS** (ESI<sup>+</sup>): calcd for C<sub>18</sub>H<sub>22</sub>N<sub>3</sub> [M+H]<sup>+</sup>: 280.1808, found: 280.1812.

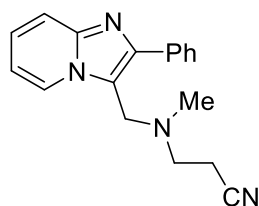

**5aad**, 3-(methyl((2-phenylimidazo[1,2-*a*]pyridin-3-yl)methyl)amino)propanenitrile

**<sup>1</sup>H NMR** (400 MHz, CDCl<sub>3</sub>) δ 8.46 (d, *J* = 6.8Hz, 1H), 7.72 (d, *J* = 7.2Hz, 2H), 7.63 (d, *J* = 8.8Hz, 1H), 7.45 (t, *J* = 7.6Hz, 2H), 7.36 (t, *J* = 7.4Hz, 1H), 7.26-7.21 (m, 1H), 6.85 (t, *J* = 6.8Hz, 1H), 4.04 (s, 2H), 2.70 (t, *J* = 6.6Hz, 2H), 2.42 (t, *J* = 6.6Hz, 2H), 2.24 (s, 3H);

**<sup>13</sup>C NMR** (101 MHz, CDCl<sub>3</sub>) δ 145.1, 134.2, 128.8, 128.4, 127.7, 125.5, 124.8, 118.5, 117.0, 115.9, 112.0, 52.4, 51.8, 51.0, 40.8, 16.2.

**HRMS** (ESI<sup>+</sup>): calcd for C<sub>18</sub>H<sub>19</sub>N<sub>4</sub> [M+H]<sup>+</sup>: 291.1604, found: 291.1611.

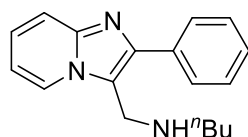

**5aae**, *N*-((2-phenylimidazo[1,2-*a*]pyridin-3-yl)methyl)butan-1-amine

**<sup>1</sup>H NMR** (400 MHz, CDCl<sub>3</sub>) δ 8.34 (d, *J* = 6.8Hz, 1H), 7.73 (d, *J* = 7.2Hz, 2H), 7.61 (d, *J* = 9.2Hz, 1H), 7.45 (t, *J* = 7.4Hz, 2H), 7.35 (t, *J* = 7.4Hz, 1H), 7.20-7.15 (m, 1H), 6.80 (t, *J* = 7.2Hz, 1H), 4.21 (s, 2H), 2.68 (t, *J* = 7.0Hz, 2H), 1.51-1.44 (m, 2H), 1.36-1.30 (m, 2H), 0.88 (t, *J* = 7.4Hz, 3H);

**<sup>13</sup>C NMR** (101 MHz, CDCl<sub>3</sub>) δ 144.8, 143.8, 134.4, 128.5, 128.4, 127.6, 124.8, 124.4, 118.4, 117.1, 111.8, 49.1, 42.9, 31.9, 20.3, 13.8.

**HRMS** (ESI<sup>+</sup>): calcd for C<sub>18</sub>H<sub>22</sub>N<sub>3</sub> [M+H]<sup>+</sup>: 280.1808, found: 280.1812.

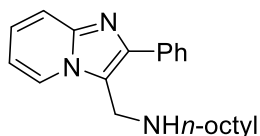

**5aaf**, *N-((2-phenylimidazo[1,2-a]pyridin-3-yl)methyl)octan-1-amine*

**<sup>1</sup>H NMR** (400 MHz, CDCl<sub>3</sub>) δ 8.35 (d, *J* = 7.2Hz, 1H), 7.75 (d, *J* = 7.2Hz, 2H), 7.62 (d, *J* = 9.2Hz, 1H), 7.46 (t, *J* = 7.4Hz, 2H), 7.36 (t, *J* = 6.8Hz, 1H), 7.22-7.17 (m, 1H), 6.81 (t, *J* = 7.4Hz, 1H), 4.23 (s, 2H), 2.68 (t, *J* = 7.2Hz, 2H), 1.53-1.46 (m, 2H), 1.31-1.23 (m, 10H), 0.87 (t, *J* = 6.8Hz, 3H);

**<sup>13</sup>C NMR** (101 MHz, CDCl<sub>3</sub>) δ 144.9, 143.9, 134.4, 128.5, 128.5, 127.7, 124.8, 124.5, 118.3, 117.2, 111.9, 49.4, 42.8, 31.7, 29.7, 29.4, 29.2, 27.2, 22.6, 14.0.

**HRMS** (ESI<sup>+</sup>): calcd for C<sub>22</sub>H<sub>30</sub>N<sub>3</sub> [M+H]<sup>+</sup>: 336.2434, found: 336.2439.

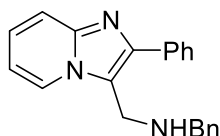

**5aag**, *N-benzyl-1-((2-phenylimidazo[1,2-a]pyridin-3-yl)methyl)methanamine*

**<sup>1</sup>H NMR** (400 MHz, CDCl<sub>3</sub>) δ 8.31 (d, *J* = 6.8Hz, 1H), 7.71 (d, *J* = 7.2Hz, 2H), 7.66 (d, *J* = 8.8Hz, 1H), 7.45 (t, *J* = 7.2Hz, 2H), 7.39 (d, *J* = 7.2Hz, 1H), 7.35-7.28 (m, 5H), 7.24 (t, *J* = 8.2Hz, 1H), 6.85 (t, *J* = 6.8Hz, 1H), 4.25 (s, 2H), 3.88 (s, 2H), 1.98 (s, 1H);

**<sup>13</sup>C NMR** (101 MHz, CDCl<sub>3</sub>) δ 144.9, 143.9, 139.6, 134.2, 129.2, 128.5, 128.4, 128.2, 127.6, 127.1, 124.8, 124.6, 118.1, 117.1, 111.9, 53.2, 41.9.

**HRMS** (ESI<sup>+</sup>): calcd for C<sub>21</sub>H<sub>20</sub>N<sub>3</sub> [M+H]<sup>+</sup>: 314.1652, found 314.1658.

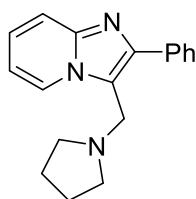

**5aah**, *2-phenyl-3-(pyrrolidin-1-ylmethyl)imidazo[1,2-a]pyridine*

**<sup>1</sup>H NMR** (400 MHz, CDCl<sub>3</sub>) δ 8.46 (d, *J* = 6.8Hz, 1H), 7.79 (d, *J* = 7.2Hz, 2H), 7.61 (d, *J* = 8.8Hz, 1H), 7.44 (t, *J* = 7.6Hz, 2H), 7.35 (t, *J* = 7.4Hz, 1H), 7.19 (t, *J* = 8.0Hz, 1H), 6.79 (t, *J* = 6.8Hz, 1H), 4.08 (s, 2H), 2.50 (s, 4H), 1.73 (s, 4H);

**<sup>13</sup>C NMR** (101 MHz, CDCl<sub>3</sub>) δ 144.8, 144.0, 134.7, 129.0, 128.3, 127.5, 125.4, 124.3, 118.0, 117.0, 111.7, 53.7, 48.7, 23.6.

**HRMS** (ESI<sup>+</sup>): calcd for C<sub>18</sub>H<sub>20</sub>N<sub>3</sub> [M+H]<sup>+</sup>: 278.1652, found: 278.1659.

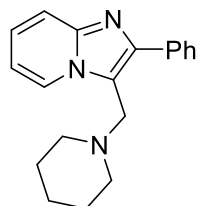

**5aai**, 2-phenyl-3-(piperidin-1-ylmethyl)imidazo[1,2-a]pyridine

**<sup>1</sup>H NMR** (400 MHz, CDCl<sub>3</sub>) δ 8.48 (d, *J* = 6.8Hz, 1H), 7.80 (d, *J* = 7.2Hz, 2H), 7.61 (d, *J* = 8.8Hz, 1H), 7.44 (t, *J* = 6.6Hz, 2H), 7.34 (t, *J* = 7.4Hz, 1H), 7.18 (t, *J* = 8.0Hz, 1H), 6.78 (t, *J* = 6.8Hz, 1H), 3.91 (s, 2H), 2.40 (s, 4H), 1.55-1.50 (m, 4H), 1.41 (s, 2H);

**<sup>13</sup>C NMR** (101 MHz, CDCl<sub>3</sub>) δ 144.9, 144.7, 134.5, 128.8, 128.3, 127.5, 125.6, 124.4, 116.9, 116.8, 111.6, 54.1, 52.3, 25.9, 24.2.

**HRMS** (ESI<sup>+</sup>): calcd for C<sub>19</sub>H<sub>22</sub>N<sub>3</sub> [M+H]<sup>+</sup>: 292.1808, found: 292.1815.

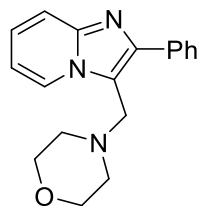

**5aaj**, 4-((2-phenylimidazo[1,2-a]pyridin-3-yl)methyl)morpholine

**<sup>1</sup>H NMR** (400 MHz, CDCl<sub>3</sub>) δ 8.39 (d, *J* = 6.8Hz, 1H), 7.78 (d, *J* = 7.2Hz, 2H), 7.61 (d, *J* = 8.8Hz, 1H), 7.43 (t, *J* = 7.4Hz, 2H), 7.34 (t, *J* = 7.4Hz, 1H), 7.20-7.16 (m, 1H), 6.79 (t, *J* = 6.8Hz, 1H), 3.93 (s, 2H), 3.63 (t, *J* = 4.6Hz, 4H), 2.44 (t, *J* = 4.4Hz, 4H);

**<sup>13</sup>C NMR** (101 MHz, CDCl<sub>3</sub>) δ 145.0, 144.9, 134.2, 128.7, 128.2, 127.6, 125.1, 124.4, 117.0, 115.7, 111.7, 66.7, 53.0, 51.8.

**HRMS** (ESI<sup>+</sup>): calcd for C<sub>18</sub>H<sub>20</sub>N<sub>3</sub>O [M+H]<sup>+</sup>: 294.1601, found: 294.1610.

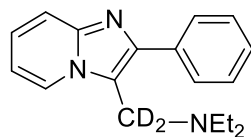

**D-5aaa**, N-ethyl-N-((2-phenylimidazo[1,2-a]pyridin-3-yl)methyl-d2)ethanamine

**<sup>1</sup>H NMR** (400 MHz, CDCl<sub>3</sub>) δ 8.47 (d, *J* = 7.2Hz, 1H), 7.76 (d, *J* = 6.8Hz, 2H), 7.59 (d, *J* = 8.8Hz,



1H), 7.41 (t,  $J = 7.4\text{Hz}$ , 2H), 7.31 (t,  $J = 7.4\text{Hz}$ , 1H), 7.15-7.11 (m, 1H), 6.73 (t,  $J = 7.4\text{Hz}$ , 1H), 2.46 (q,  $J = 7.2\text{Hz}$ , 4H), 0.93 (t,  $J = 7.0\text{Hz}$ , 6H);

$^{13}\text{C NMR}$  (101 MHz,  $\text{CDCl}_3$ )  $\delta$  144.8, 144.6, 134.6, 128.7, 128.2, 127.4, 125.6, 124.1, 117.3, 116.9, 111.3, 60.2, 46.3, 11.5.

**HRMS** ( $\text{ESI}^+$ ): calcd for  $\text{C}_{18}\text{H}_{20}\text{D}_2\text{N}_3$   $[\text{M}+\text{H}]^+$ : 282.1934, found: 282.1941.

#### 4. H and C NMR spectra of products

*N*-ethyl-*N*-((2-phenylimidazo[1,2-*a*]pyridin-3-yl)methyl)ethanamine (5aaa)

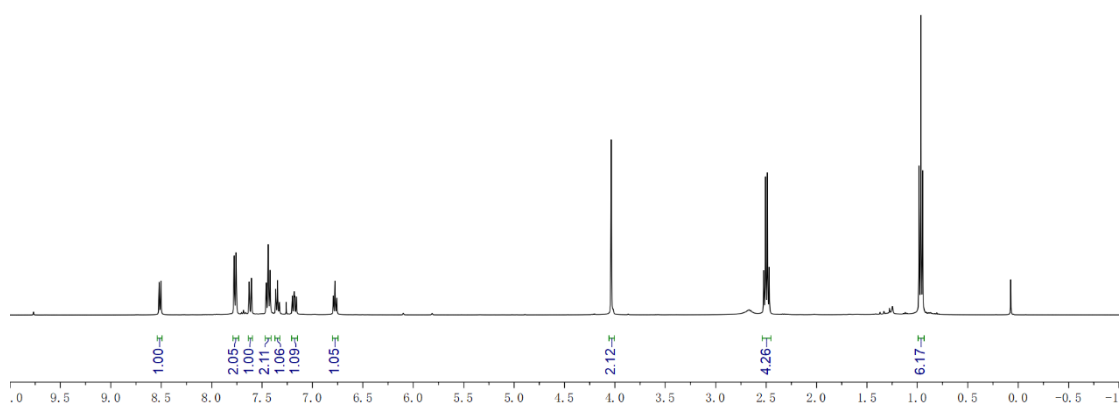

144.86  
144.69  
134.63  
128.84  
128.29  
127.60  
125.69  
124.30  
117.44  
116.97  
111.47  
47.35  
46.38  
11.56

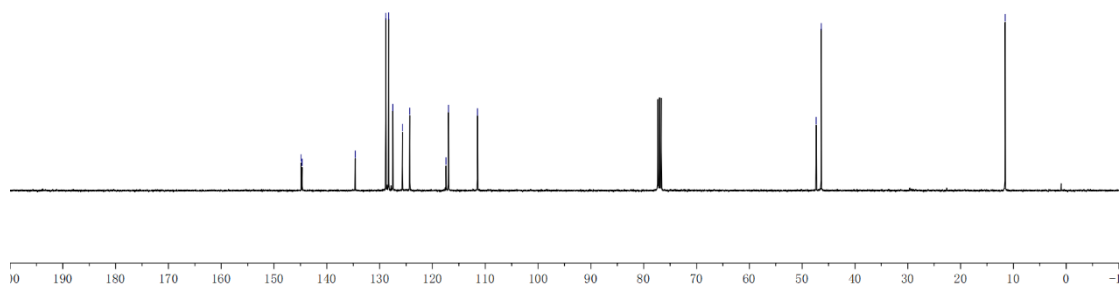

*N*-((2-([1,1'-biphenyl]-4-yl)imidazo[1,2-*a*]pyridin-3-yl)methyl)-*N*-ethylethanamine (5aba)

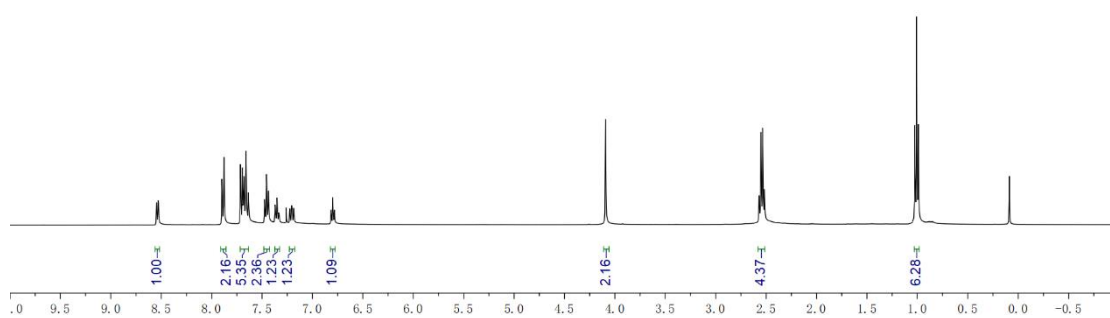

144.97  
144.33  
140.72  
140.16  
133.69  
128.73  
127.25  
127.02  
126.98  
125.70  
124.36  
117.59  
117.02  
111.53

47.54  
46.47

11.66

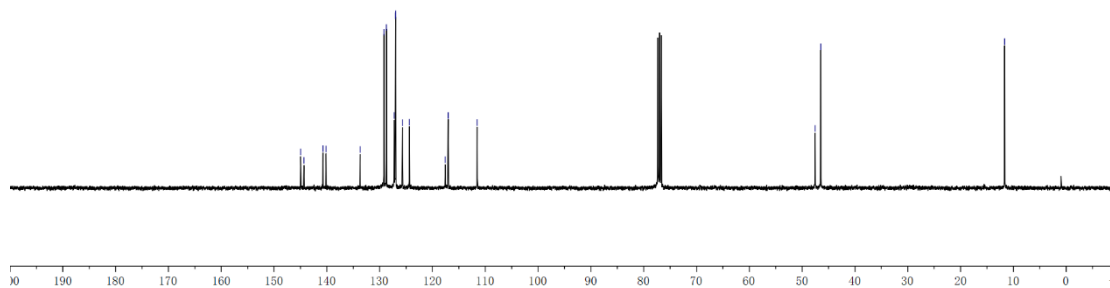

*N*-ethyl-*N*-((2-(*p*-tolyl)imidazo[1,2-*a*]pyridin-3-yl)methyl)ethanamine (5aca)

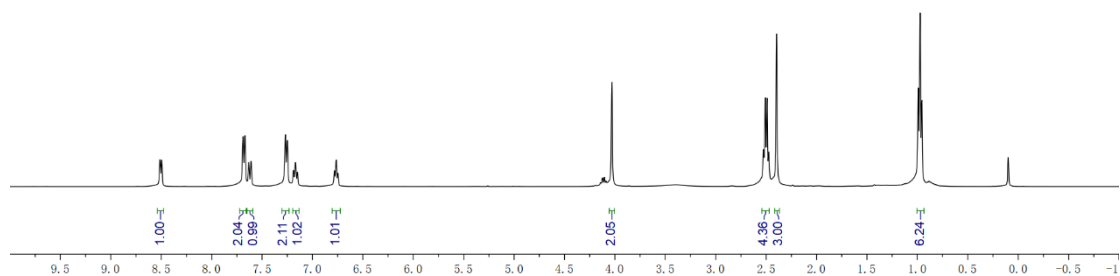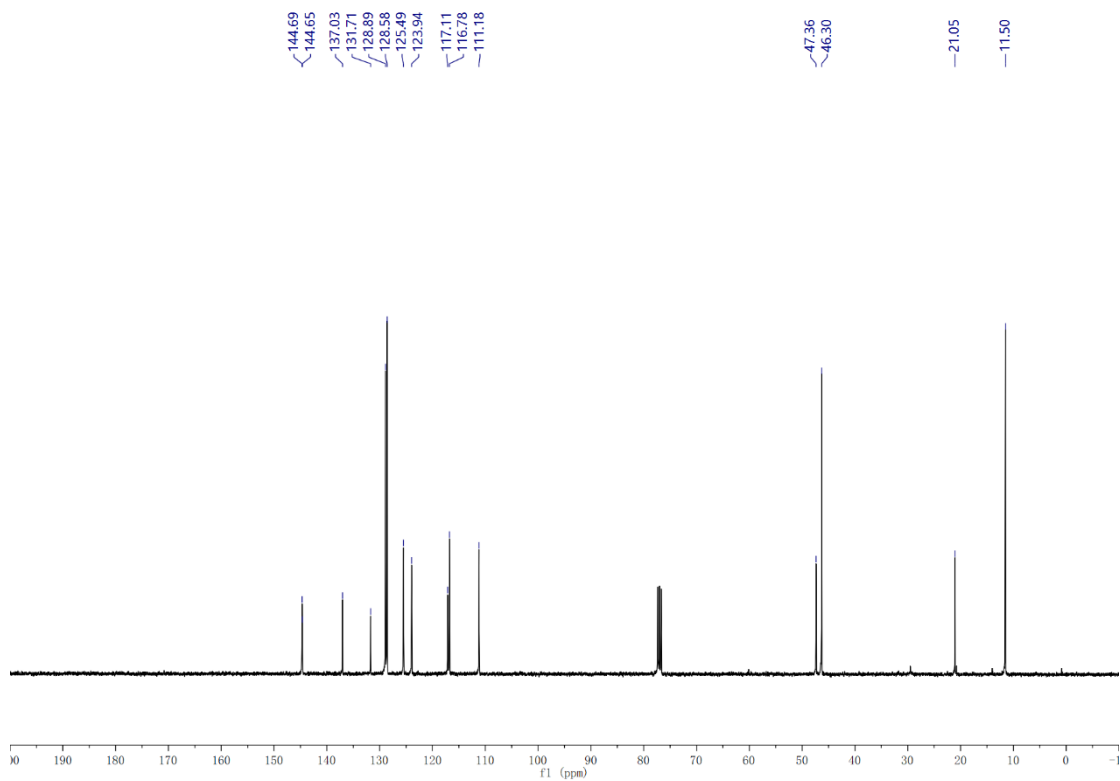

*N*-ethyl-*N*-((2-(4-methoxyphenyl)imidazo[1,2-*a*]pyridin-3-yl)methyl)ethanamine (5ada)

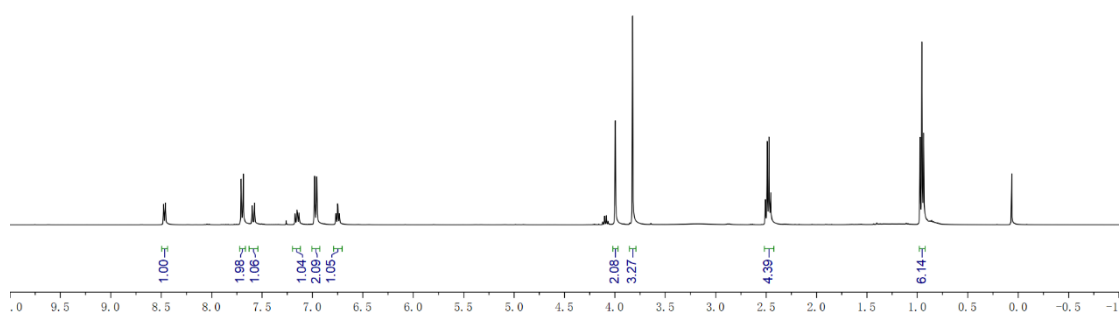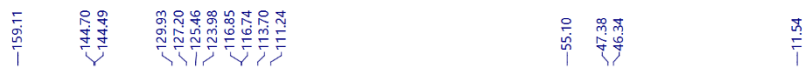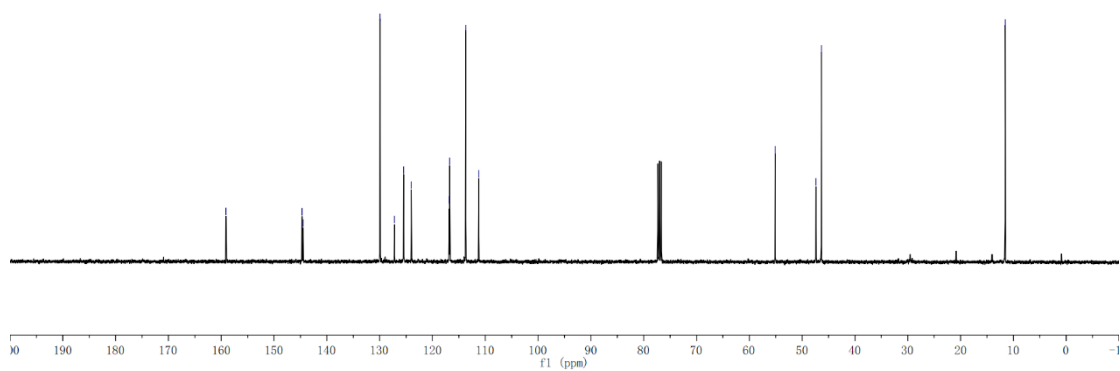

*N*-ethyl-*N*-((2-(4-(trifluoromethoxy)phenyl)imidazo[1,2-*a*]pyridin-3-yl)methyl)ethanamine (5aea)

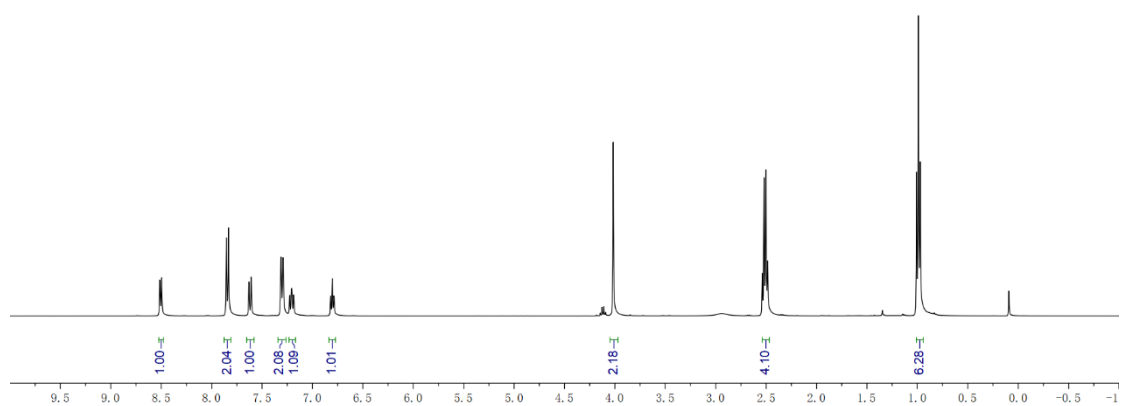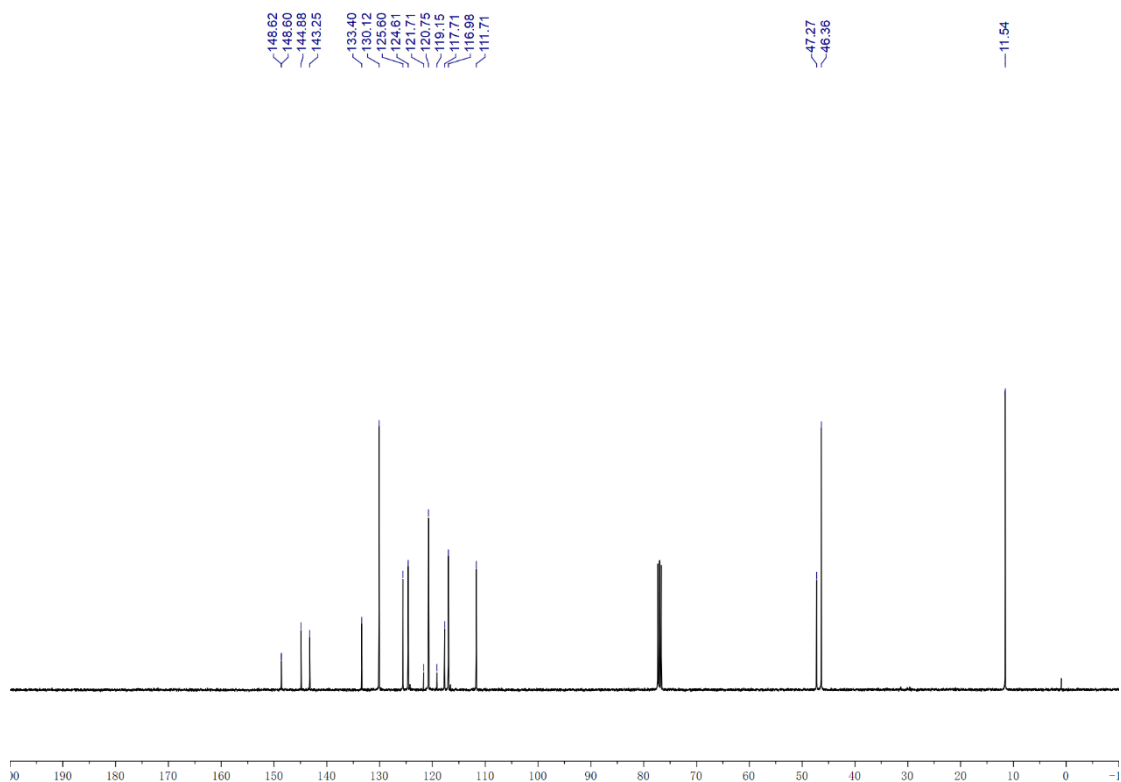

**4-(3-((diethylamino)methyl)imidazo[1,2-a]pyridin-2-yl)phenol (5afa)**

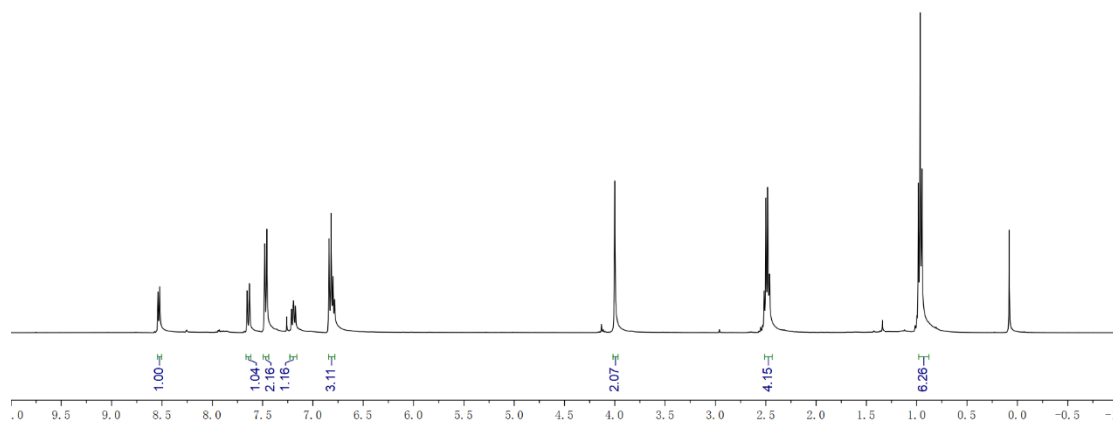

157.94  
144.43  
144.39  
130.13  
125.70  
124.78  
124.00  
116.72  
115.95  
111.79  
47.19  
46.36  
11.54

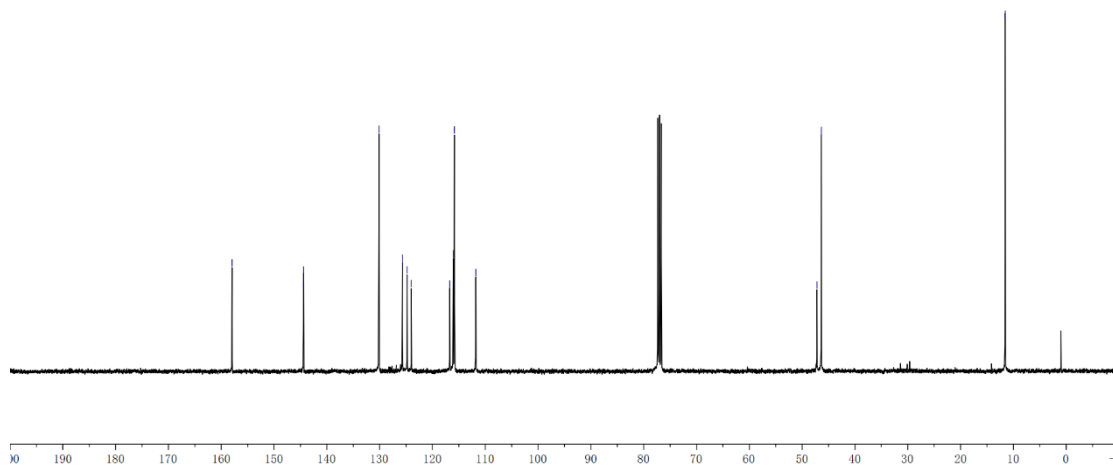

*N*-ethyl-*N*-((2-(4-fluorophenyl)imidazo[1,2-*a*]pyridin-3-yl)methyl)ethanamine (5ga)

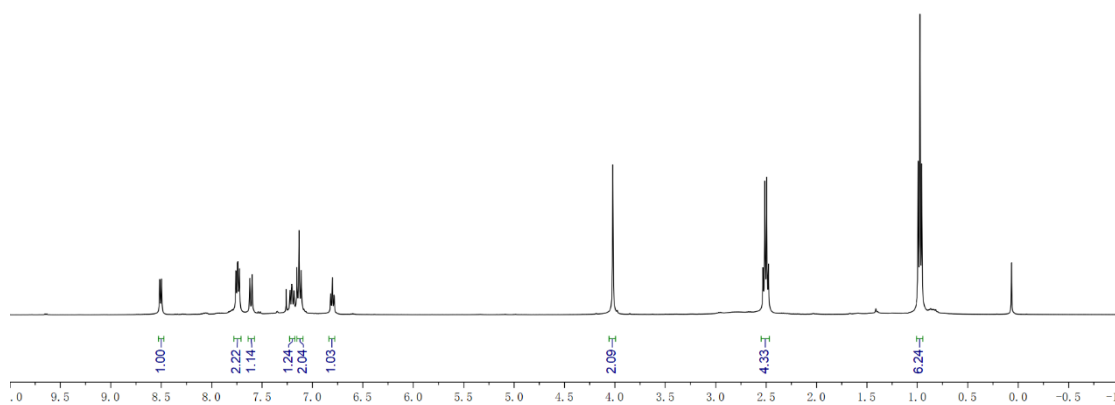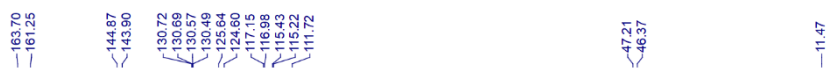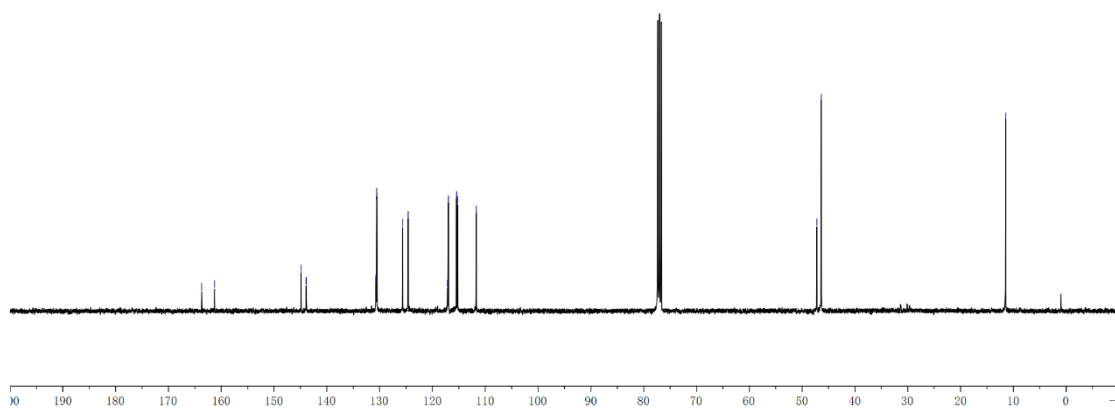



*N*-((2-(4-chlorophenyl)imidazo[1,2-*a*]pyridin-3-yl)methyl)-*N*-ethylethanamine (5aha)

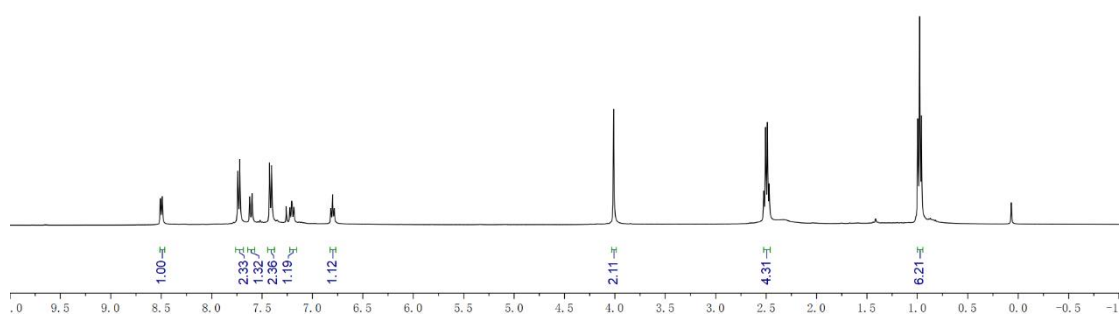

144.96  
143.80  
133.55  
133.20  
130.47  
126.87  
125.66  
124.82  
117.62  
117.07  
111.73

47.34  
46.43

11.58

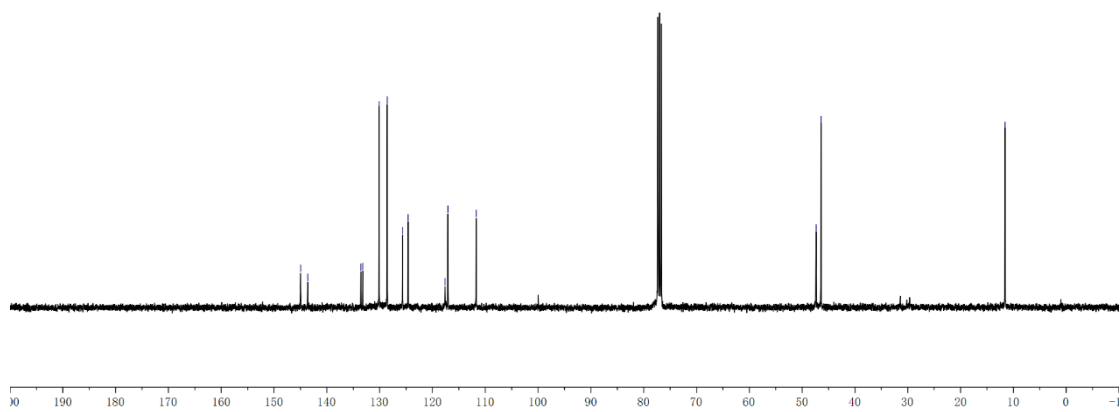

*N*-((2-(4-bromophenyl)imidazo[1,2-*a*]pyridin-3-yl)methyl)-*N*-ethylethanamine (5aia)

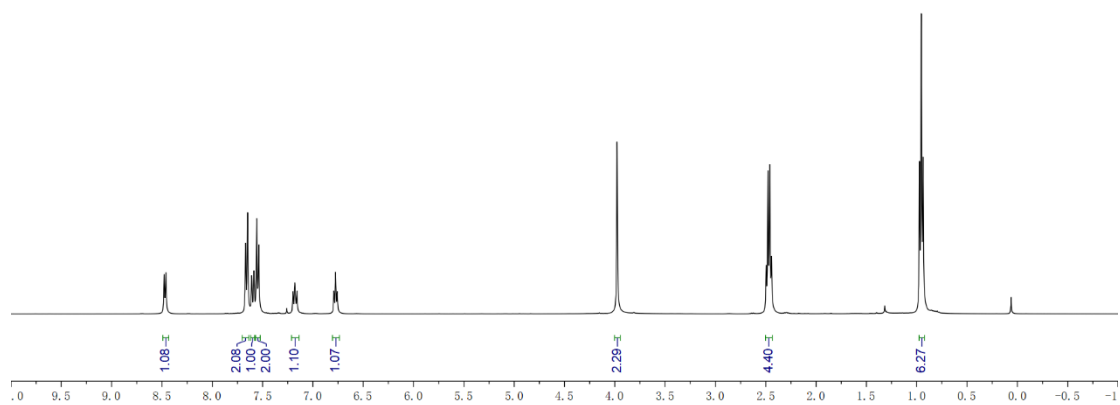

144.90  
143.48  
132.58  
131.46  
130.35  
126.60  
124.60  
121.74  
117.63  
111.70

47.27  
46.36

11.55

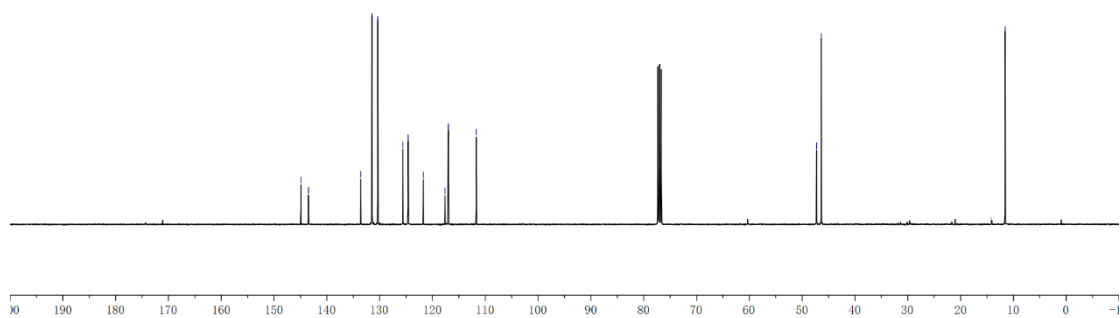

*N*-ethyl-*N*-((2-(4-(trifluoromethyl)phenyl)imidazo[1,2-*a*]pyridin-3-yl)methyl)ethanamine (5aja)

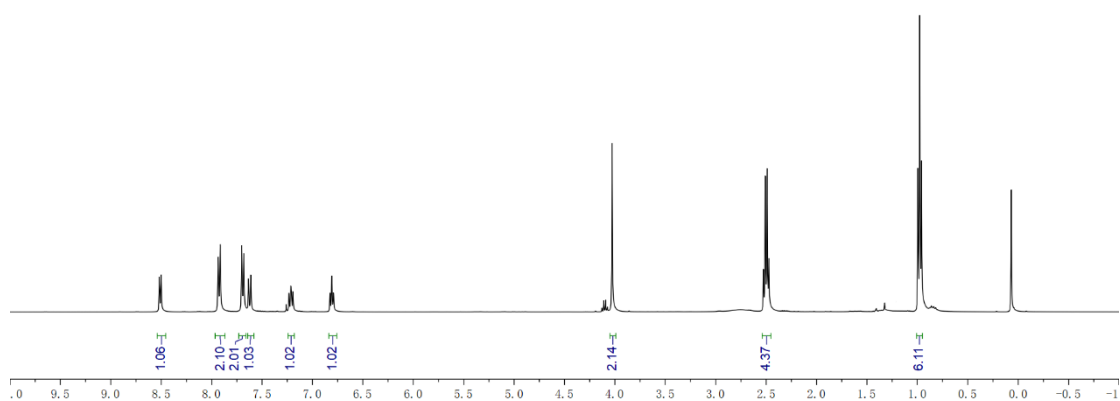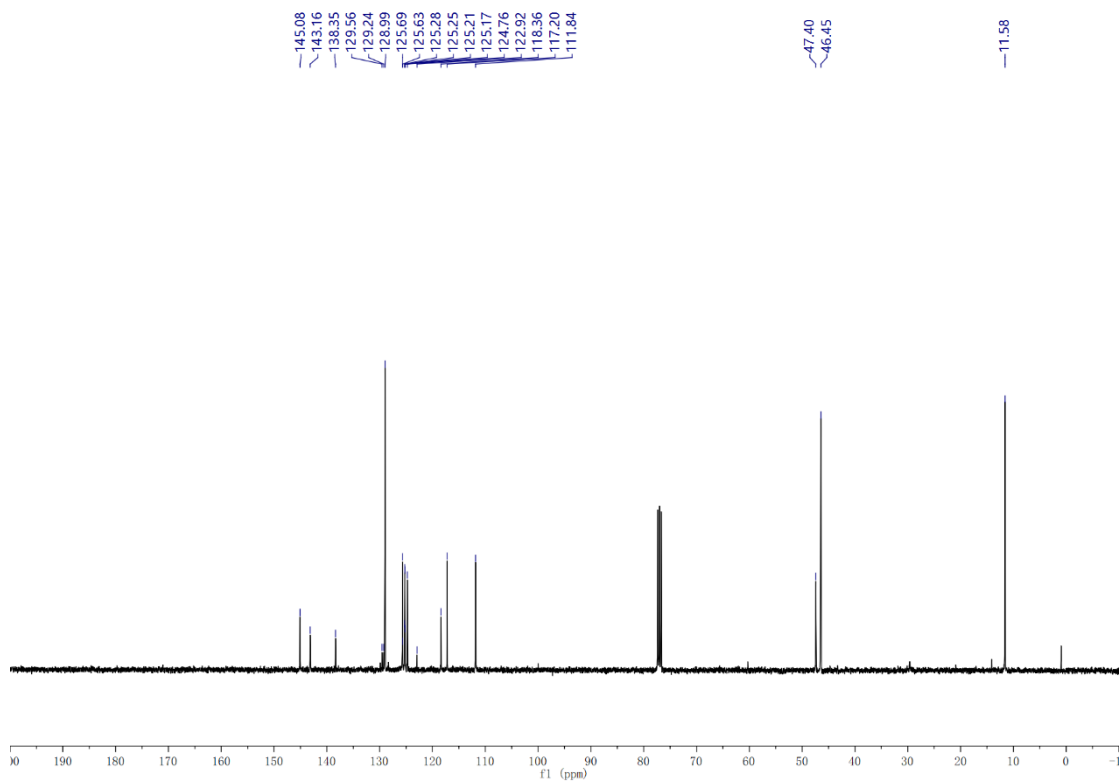

*4-(3-((diethylamino)methyl)imidazo[1,2-a]pyridin-2-yl)benzotrile (5aka)*

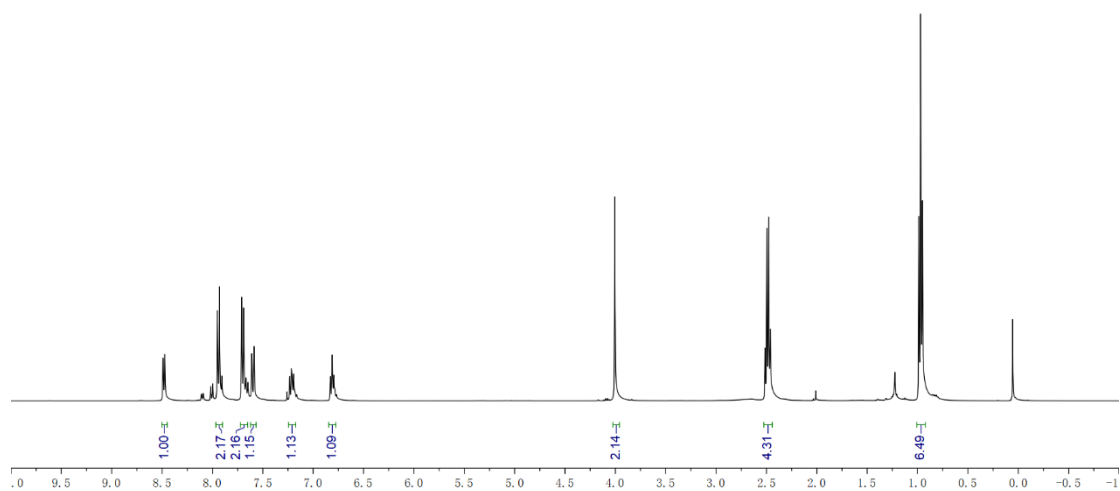

145.11  
142.52  
139.41  
132.04  
129.15  
126.24  
125.59  
124.94  
118.82  
117.24  
111.99  
110.83

47.35  
46.42

11.55

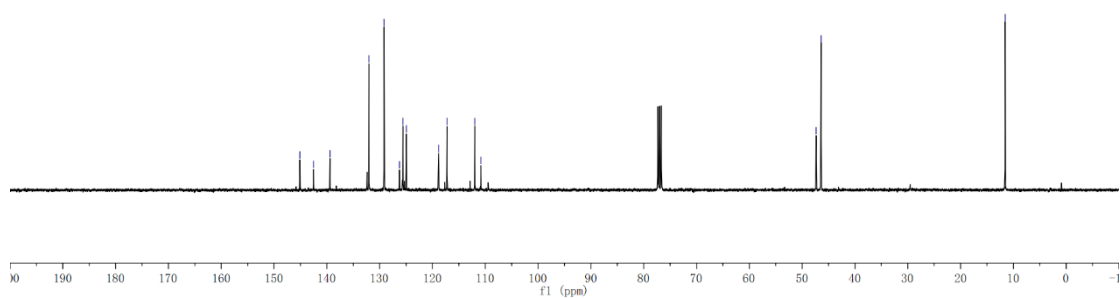

*N*-ethyl-*N*-((2-(4-nitrophenyl)imidazo[1,2-*a*]pyridin-3-yl)methyl)ethanamine (5a)

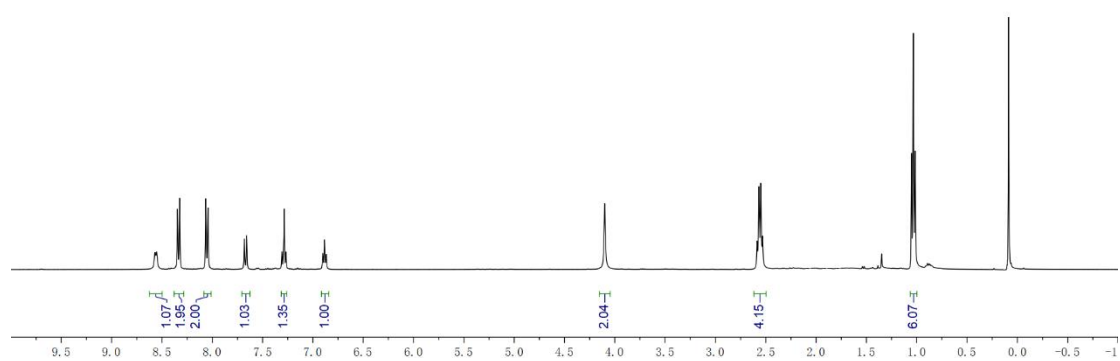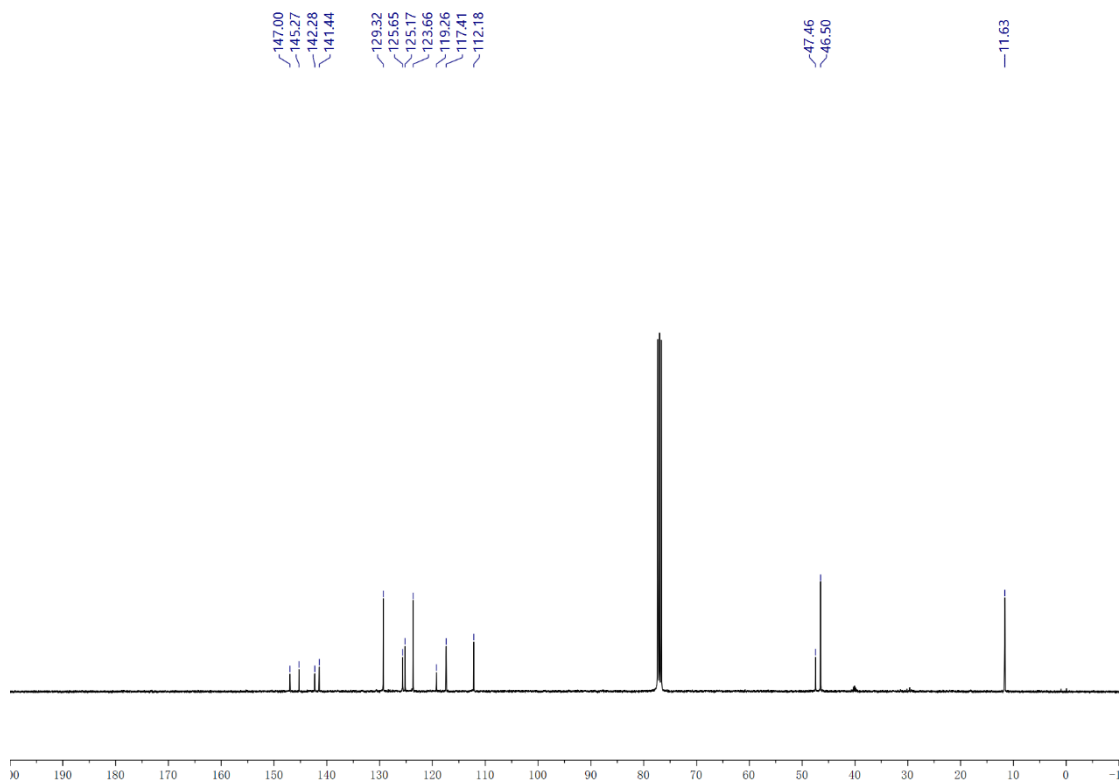

*N*-ethyl-*N*-((2-(4-(methylsulfonyl)phenyl)imidazo[1,2-*a*]pyridin-3-yl)methyl)ethanamine (5ama)

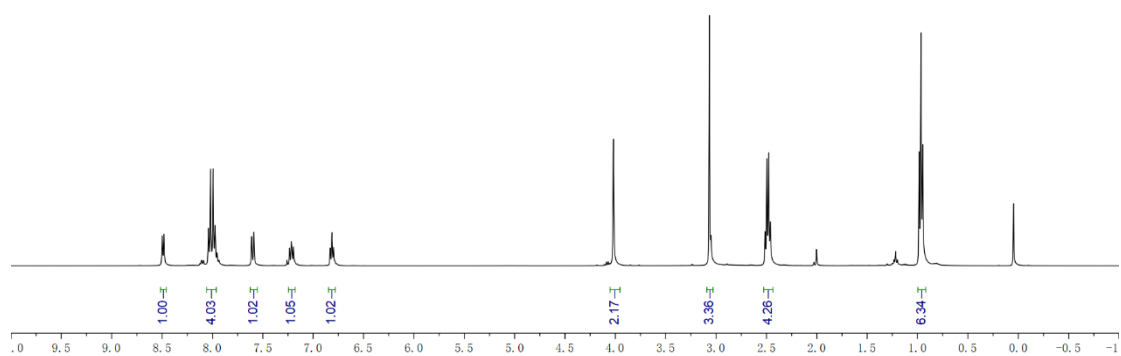

145.08  
142.41  
140.31  
139.01  
129.40  
127.32  
125.60  
124.98  
118.91  
117.19  
112.01  
47.33  
46.39  
44.46  
11.55

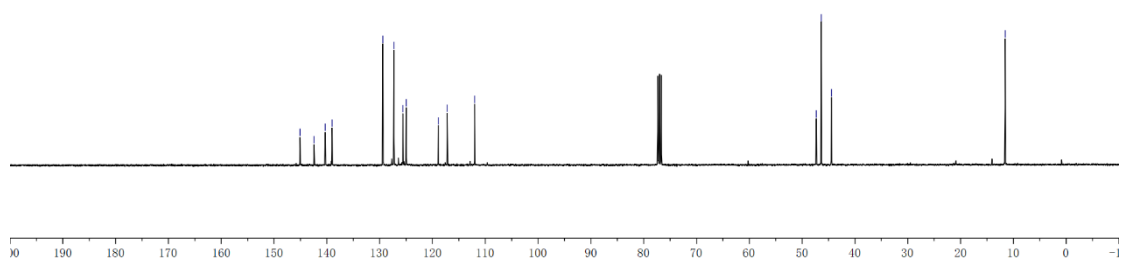

*N*-((2-(3-chlorophenyl)imidazo[1,2-*a*]pyridin-3-yl)methyl)-*N*-ethylethanamine (5ana)

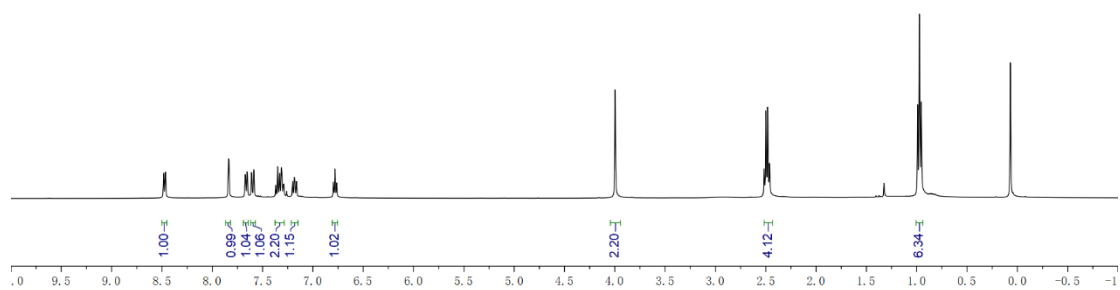

144.88  
139.55  
136.55  
134.23  
129.51  
128.82  
127.51  
126.81  
125.56  
124.58  
117.89  
117.08  
111.72

47.22  
46.37

11.55

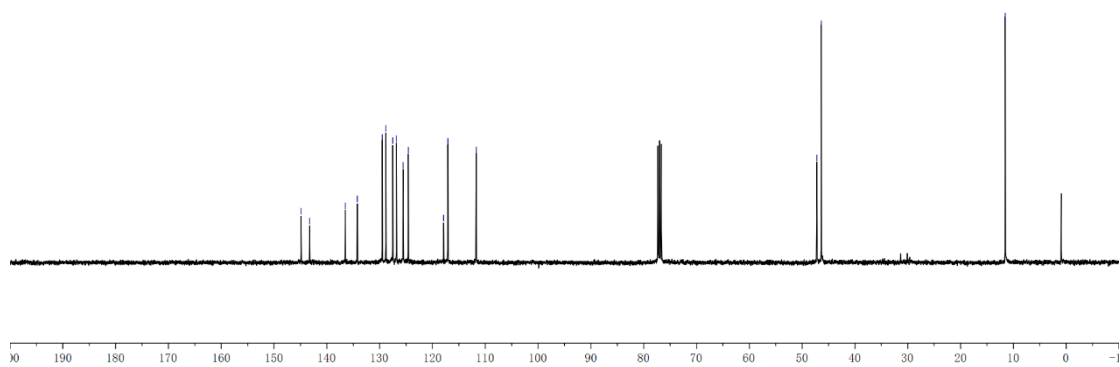

*N*-ethyl-*N*-((2-(2-methoxyphenyl)imidazo[1,2-*a*]pyridin-3-yl)methyl)ethanamine (5a0a)

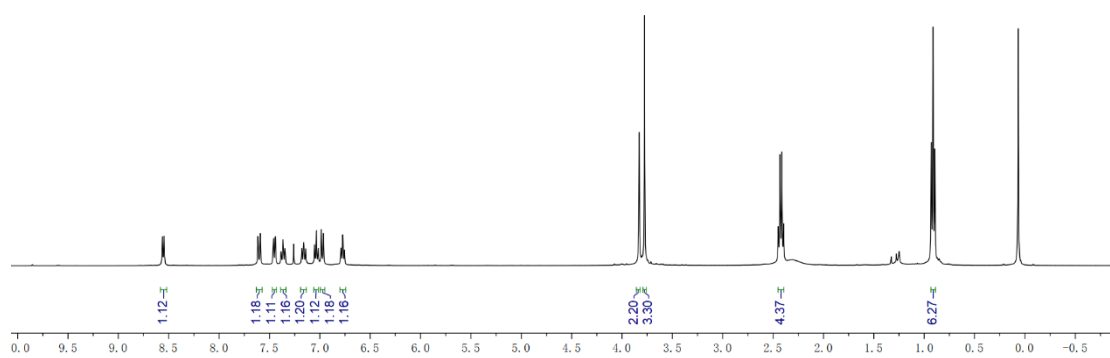

157.09, 144.97, 141.68, 132.15, 129.40, 125.75, 123.78, 123.74, 120.90, 118.76, 117.10, 111.28, 110.86, 55.44, 47.31, 46.34, 11.37

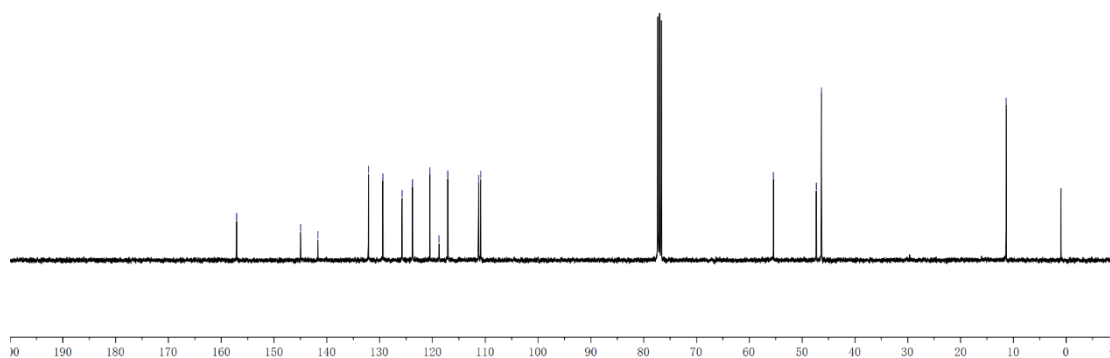



*N*-ethyl-*N*-((2-(naphthalen-2-yl)imidazo[1,2-*a*]pyridin-3-yl)methyl)ethanamine (5apa)

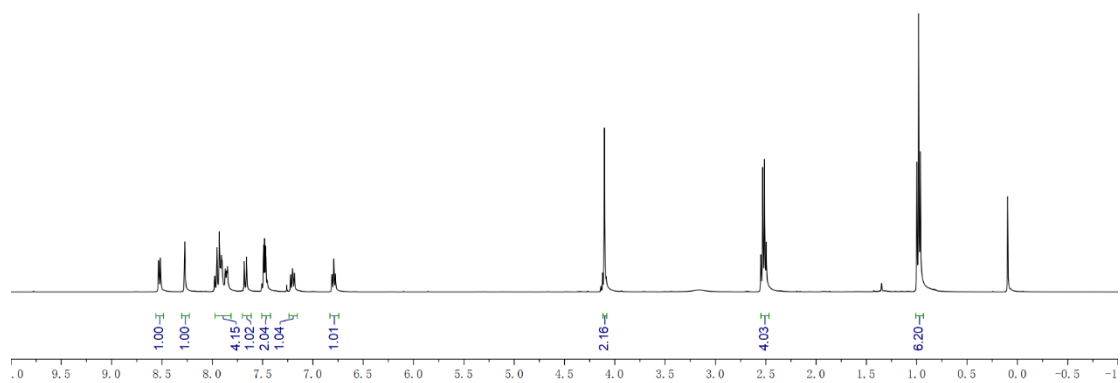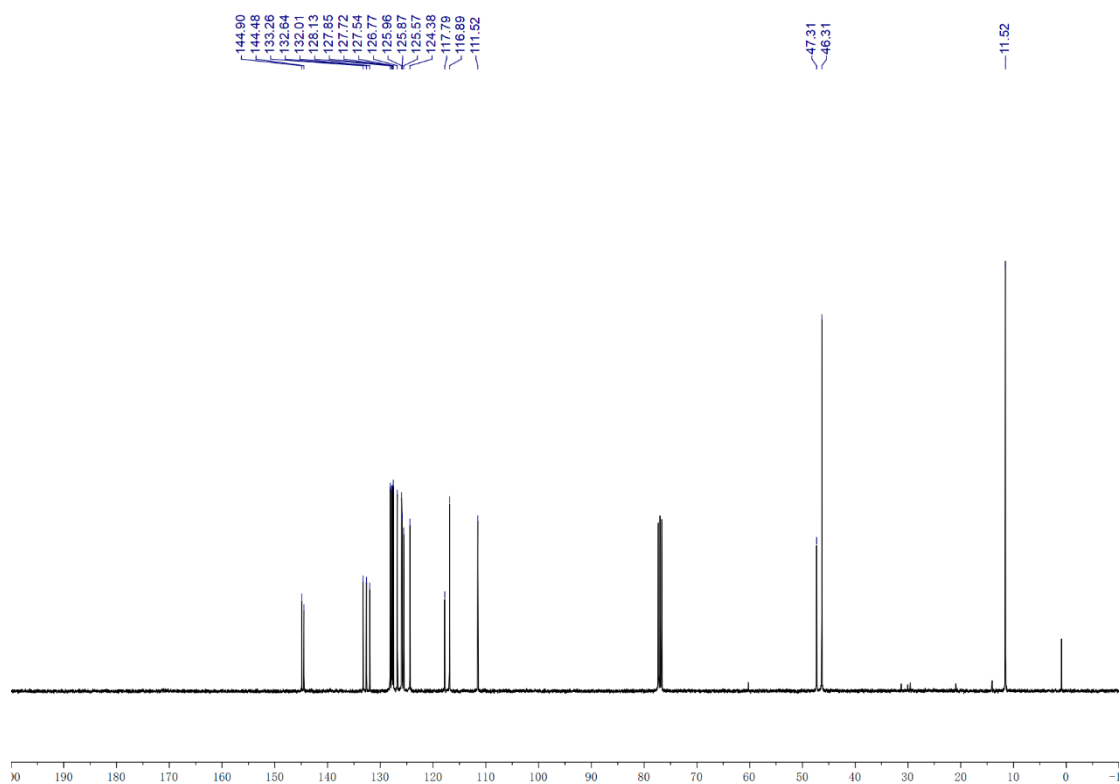

*N*-ethyl-*N*-((2-(furan-2-yl)imidazo[1,2-*a*]pyridin-3-yl)methyl)ethanamine (5aqa)

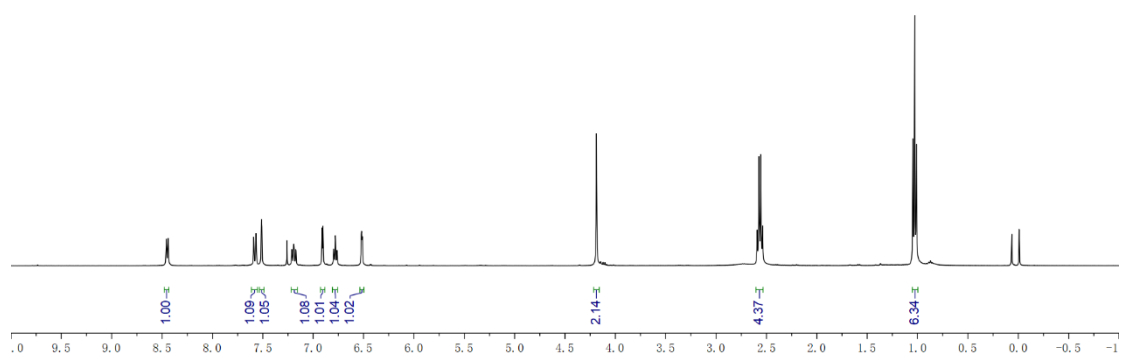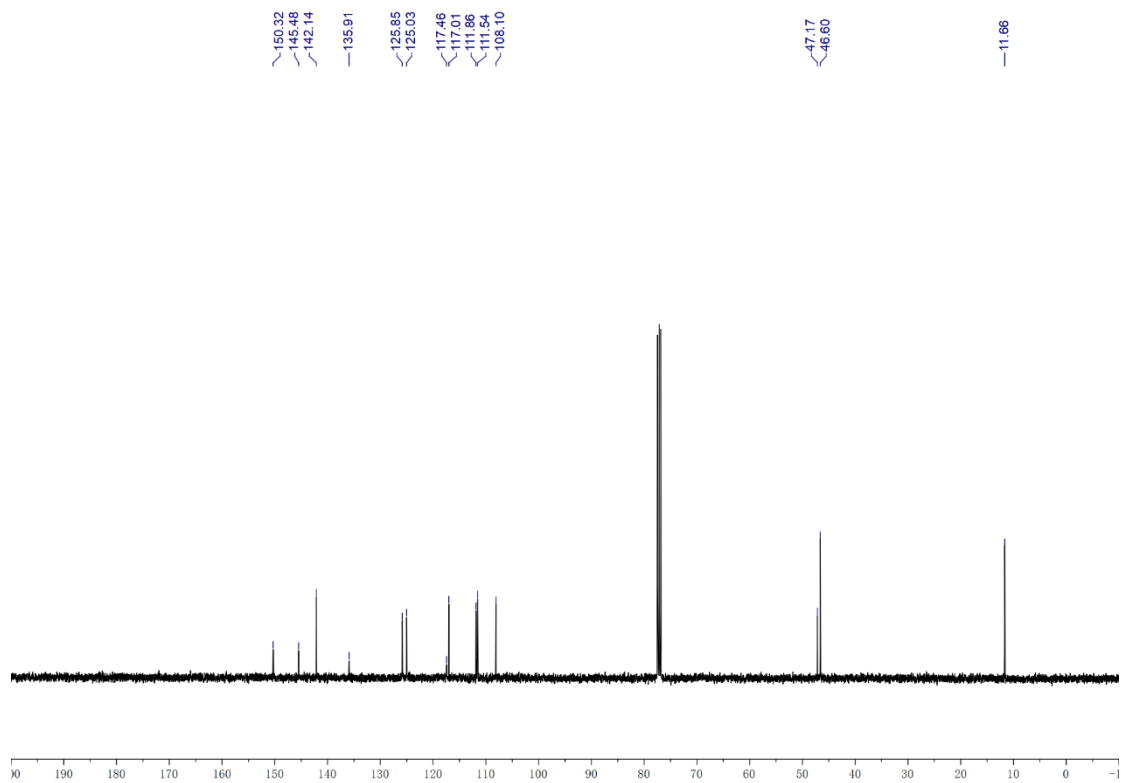

*N*-ethyl-*N*-((2-(thiophen-2-yl)imidazo[1,2-*a*]pyridin-3-yl)methyl)ethanamine (5ara)

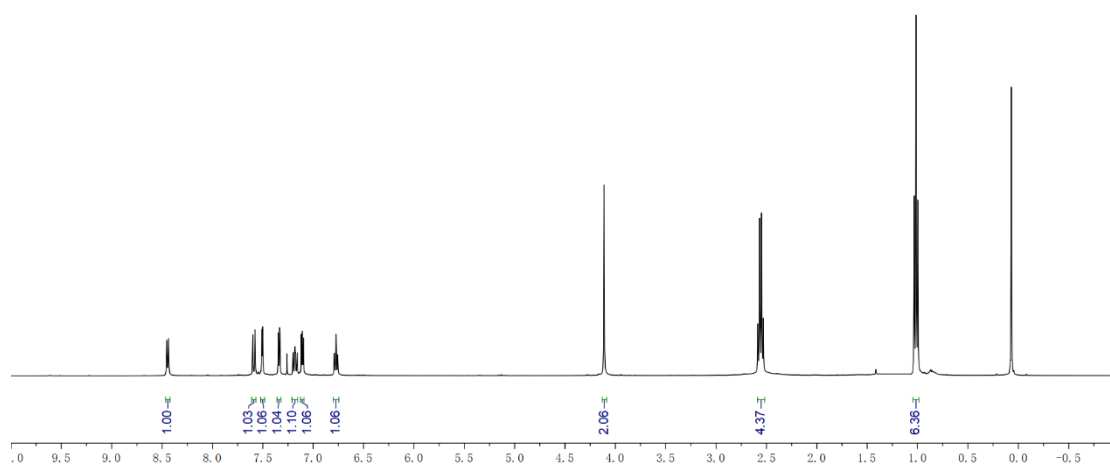

144.91  
138.91  
137.46  
127.44  
125.51  
125.44  
125.28  
124.74  
116.82  
111.71

47.59  
46.51

11.85

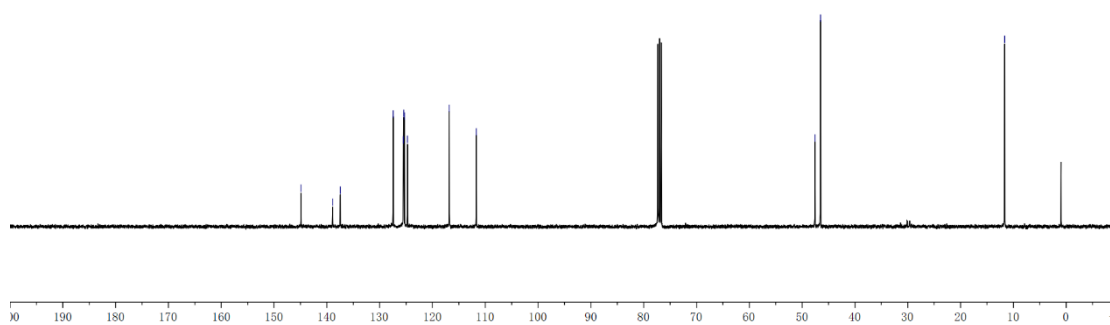

*N*-ethyl-*N*-((2-methylimidazo[1,2-*a*]pyridin-3-yl)methyl)ethanamine (5asa)

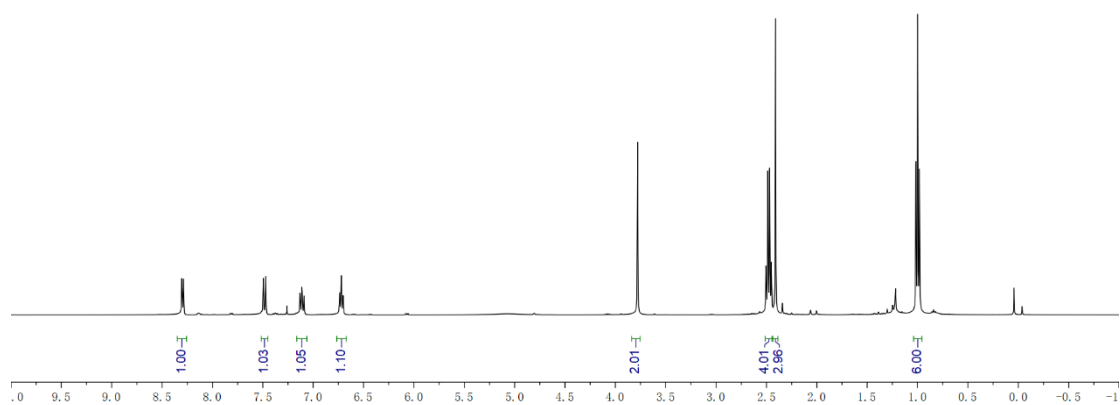

144.29  
141.22  
124.93  
123.96  
116.84  
116.06  
111.31  
46.57  
46.22  
13.19  
11.34

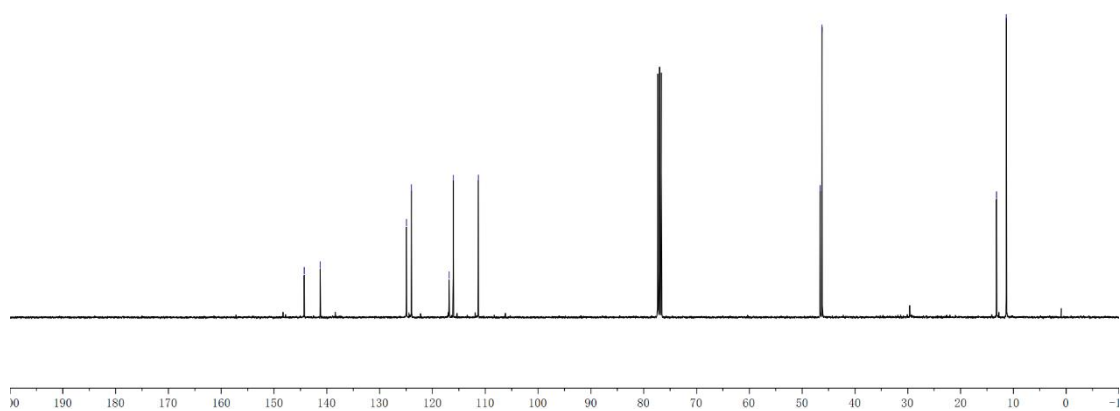

*N*-ethyl-*N*-((8-methyl-2-phenylimidazo[1,2-*a*]pyridin-3-yl)methyl)ethanamine (5baa)

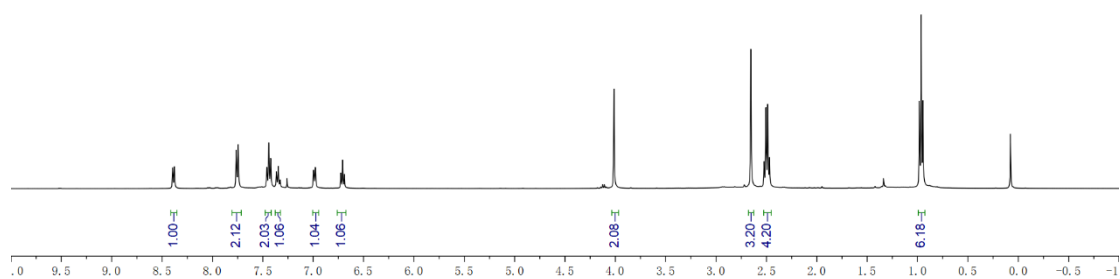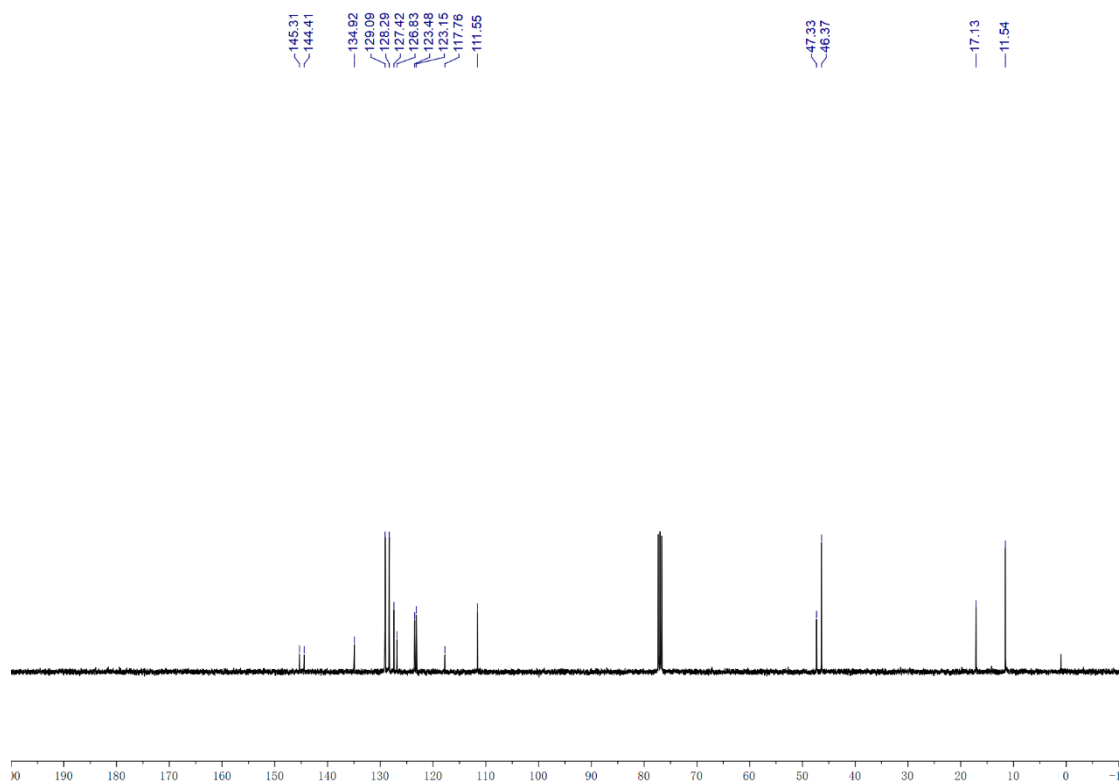

*N*-ethyl-*N*-((7-methyl-2-phenylimidazo[1,2-*a*]pyridin-3-yl)methyl)ethanamine (5ca)

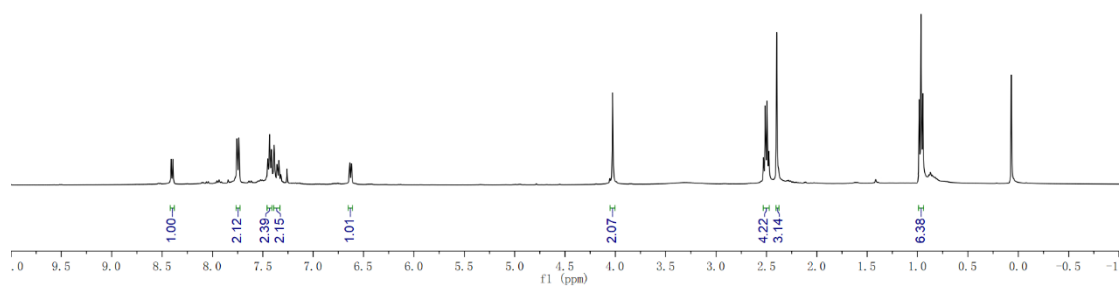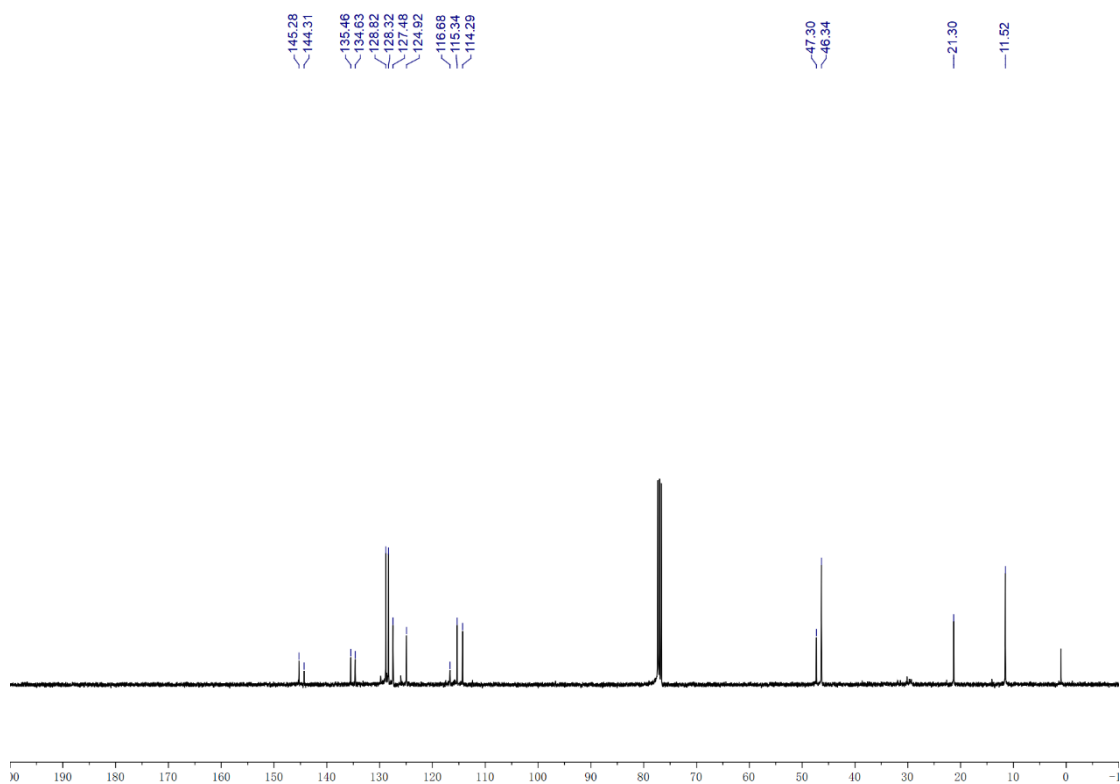

*N*-ethyl-*N*-((6-methyl-2-phenylimidazo[1,2-*a*]pyridin-3-yl)methyl)ethanamine (5daa)

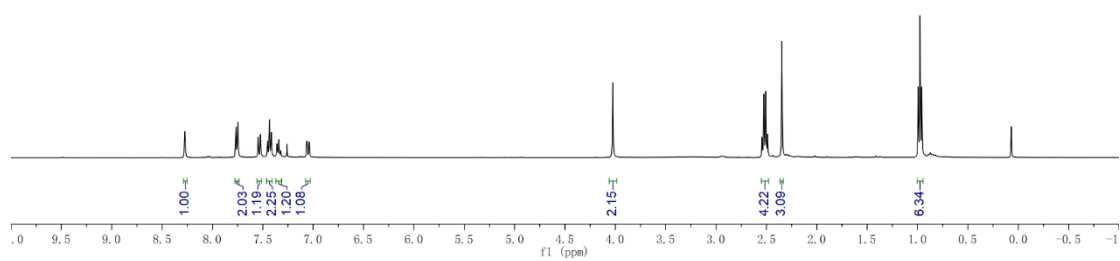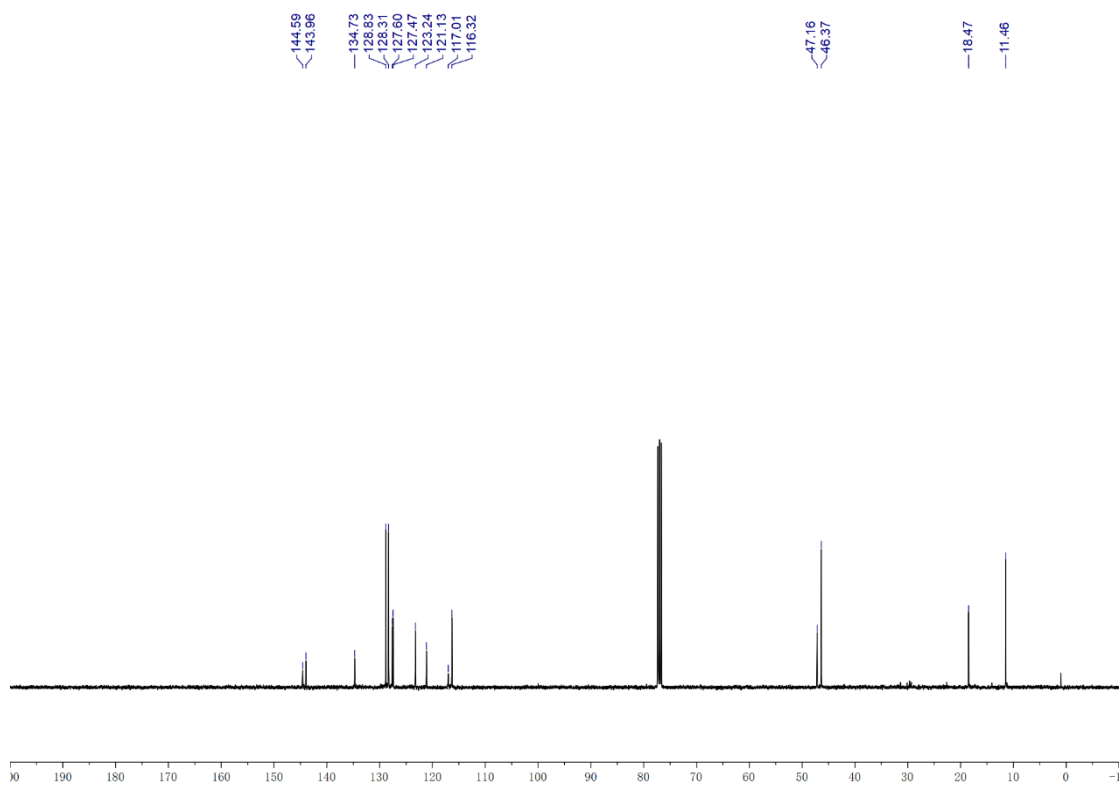

*N*-ethyl-*N*-((5-methyl-2-phenylimidazo[1,2-*a*]pyridin-3-yl)methyl)ethanamine (5aa)

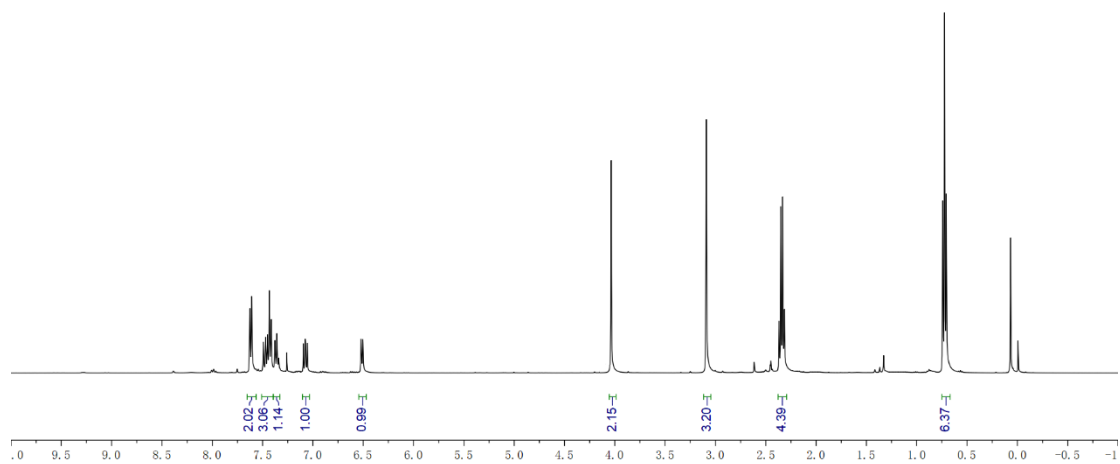

147.70  
146.88  
139.01  
135.29  
129.85  
128.15  
127.52  
124.83  
119.33  
115.22  
113.02

47.98  
44.53

19.59

10.61

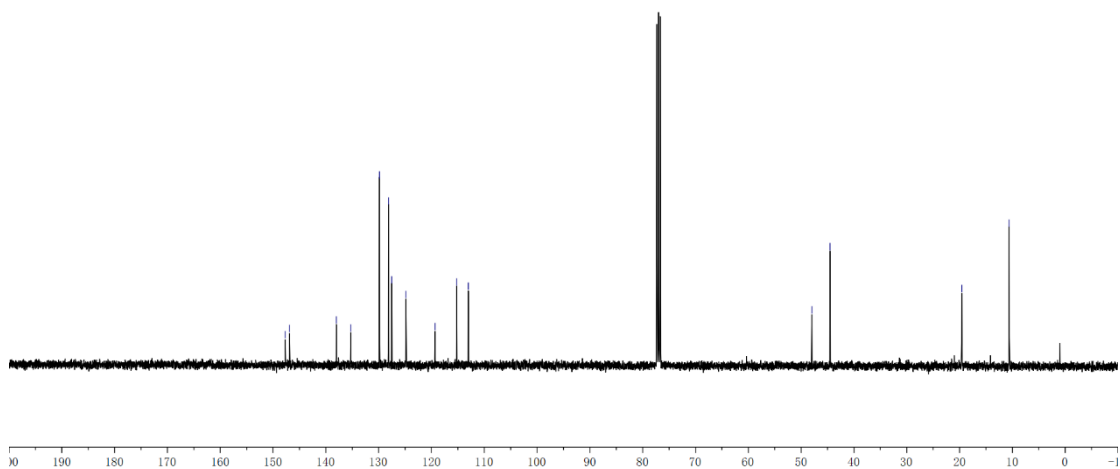



*N*-ethyl-*N*-((7-methoxy-2-phenylimidazo[1,2-*a*]pyridin-3-yl)methyl)ethanamine (5faa)

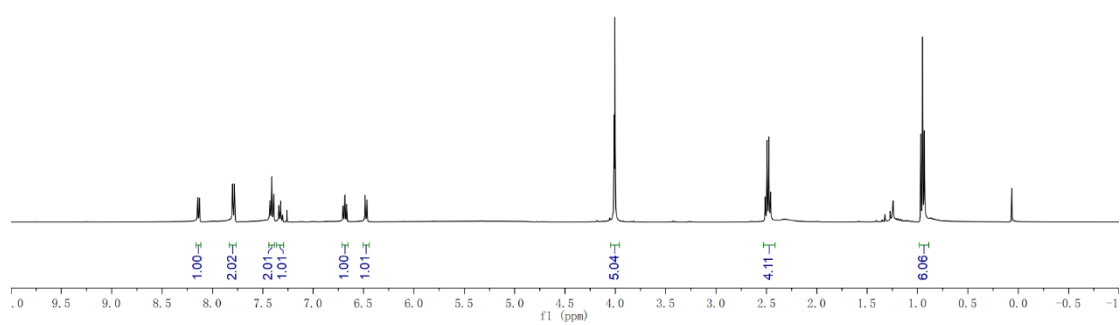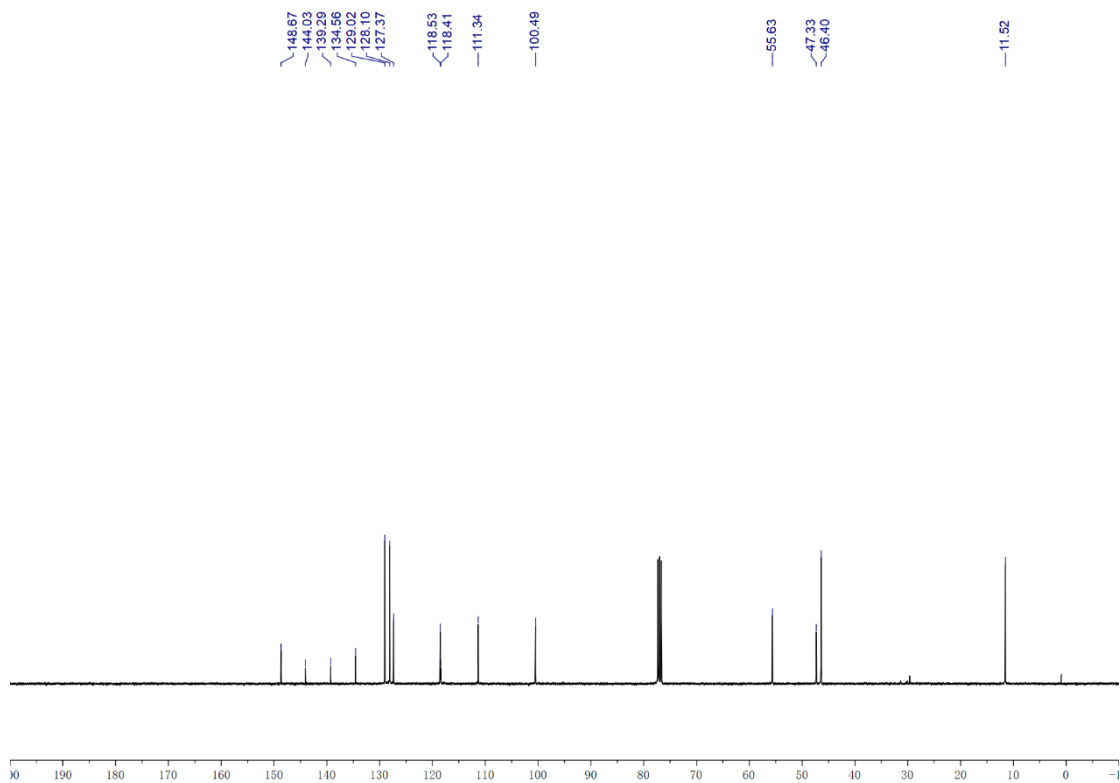

*N*-ethyl-*N*-((7-fluoro-2-phenylimidazo[1,2-*a*]pyridin-3-yl)methyl)ethanamine (5ga)

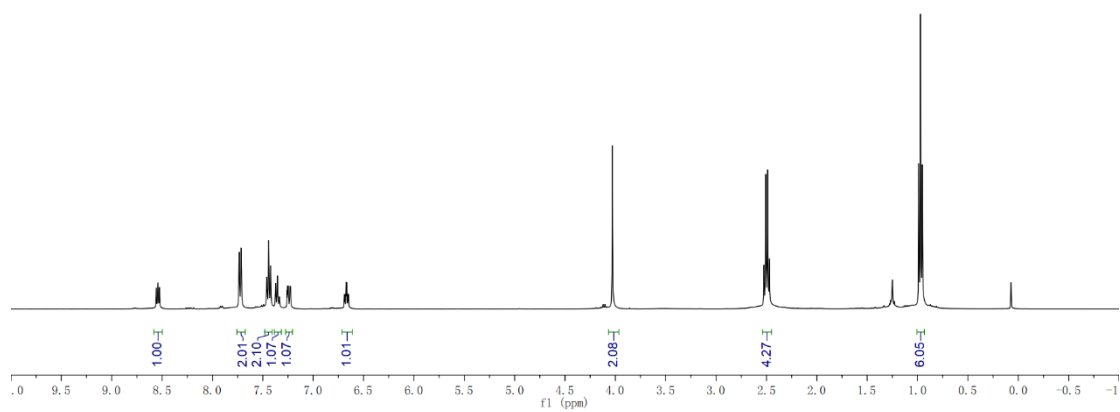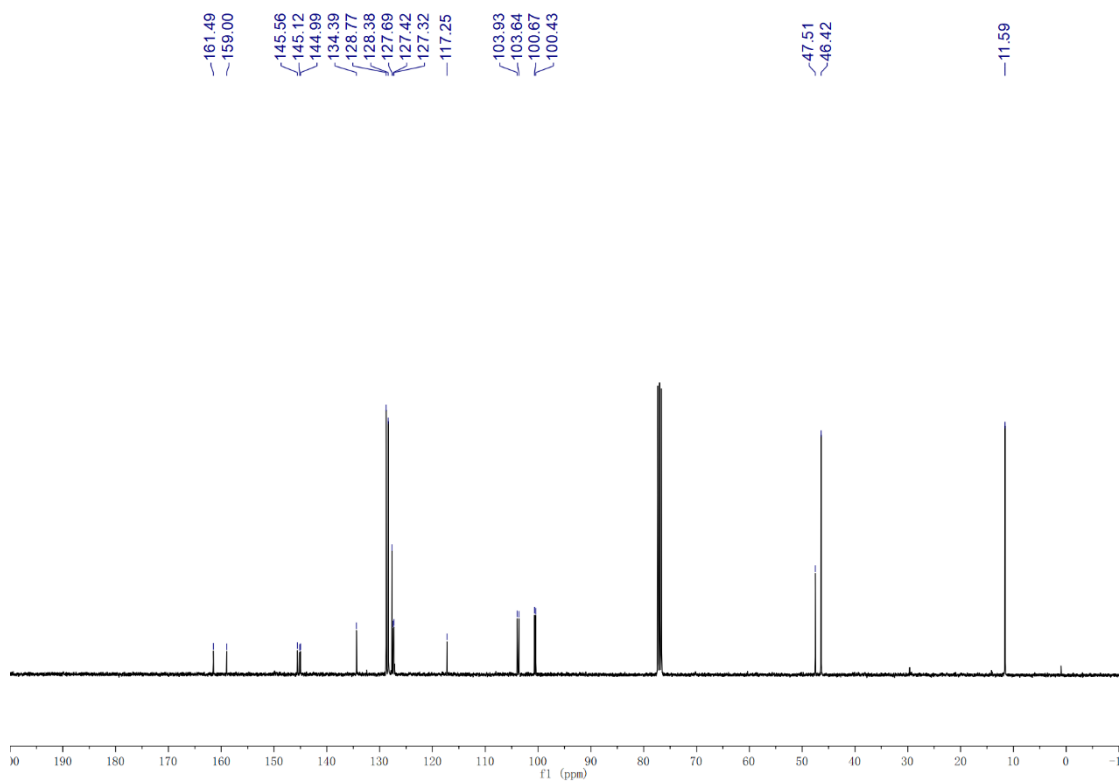

*N*-ethyl-*N*-((6-fluoro-2-phenylimidazo[1,2-*a*]pyridin-3-yl)methyl)ethanamine (5haa)

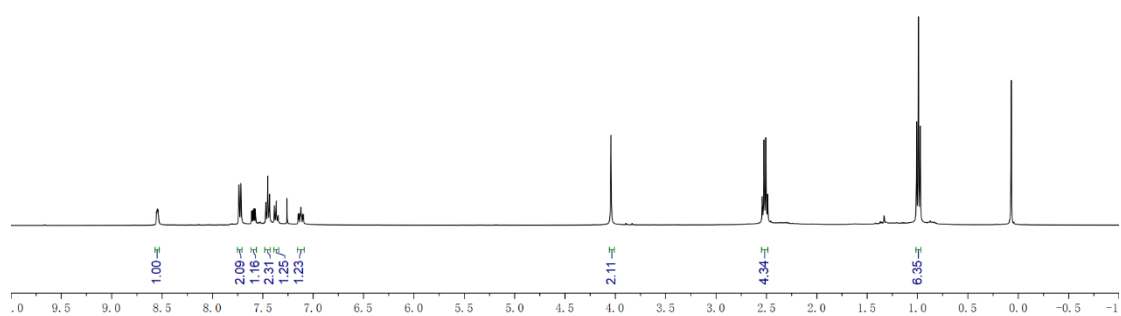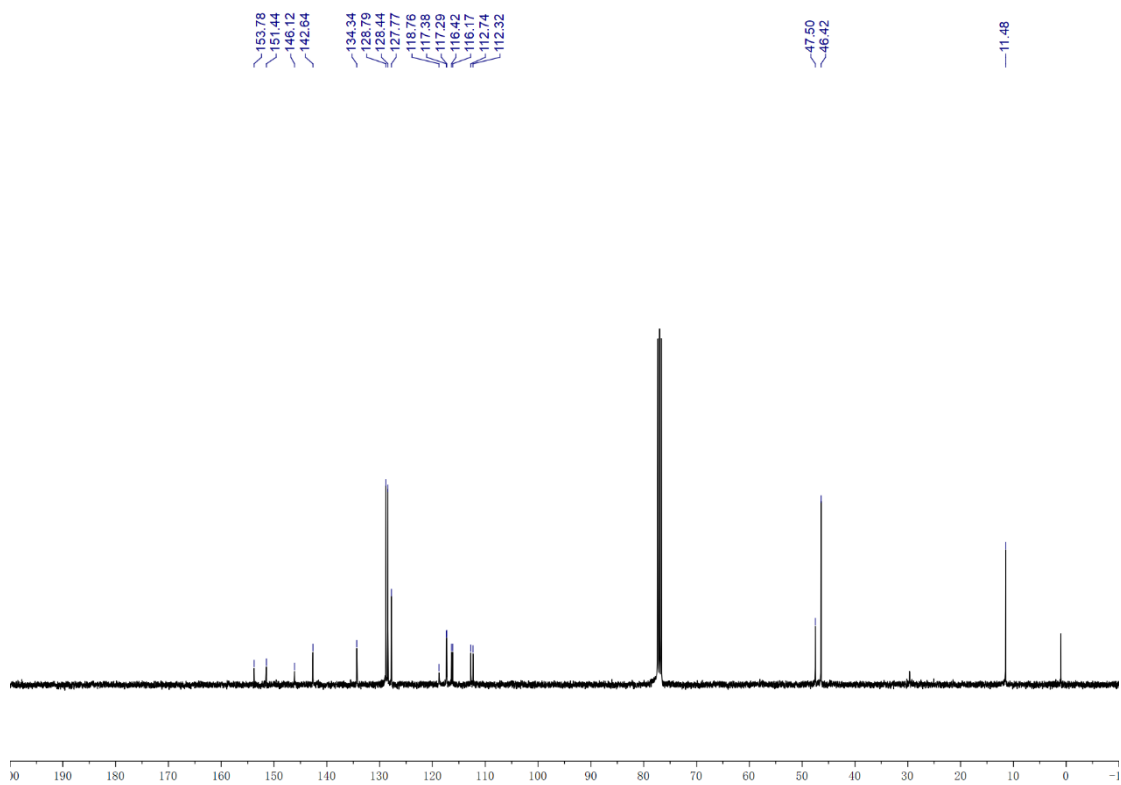

*N*-((6-bromo-2-phenylimidazo[1,2-*a*]pyridin-3-yl)methyl)-*N*-ethylethanamine (5iaa)

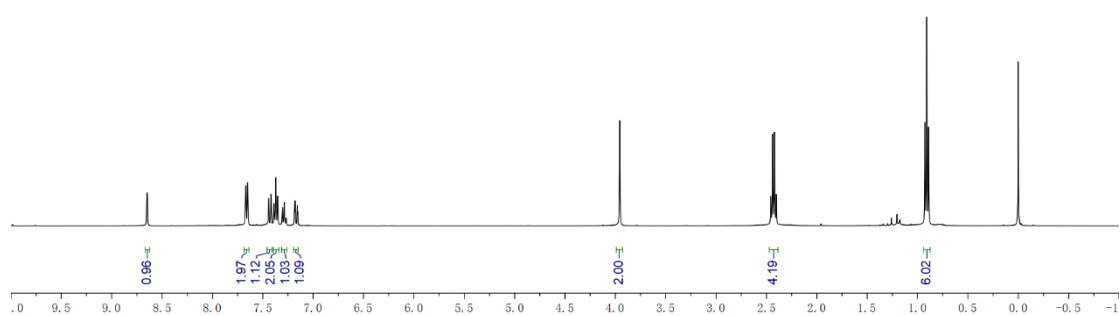

145.47  
143.30  
134.15  
128.78  
128.40  
127.80  
127.63  
125.87  
117.92  
117.63  
106.05  
47.34  
46.40  
11.50

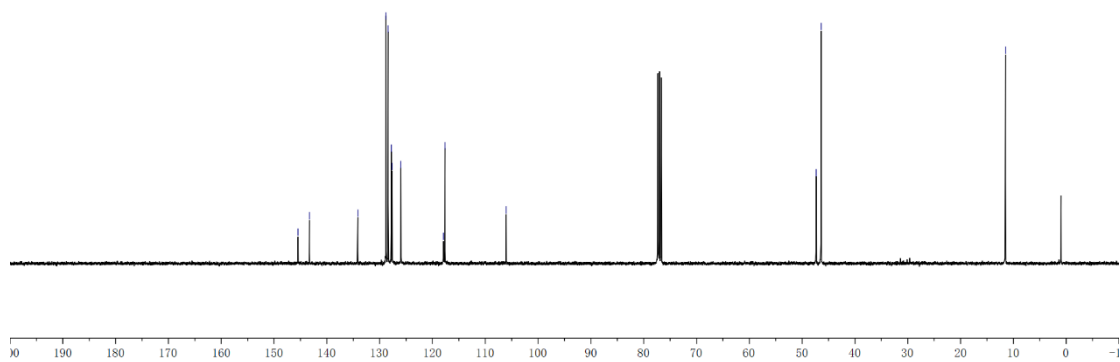

*N*-ethyl-*N*-((6-iodo-2-phenylimidazo[1,2-*a*]pyridin-3-yl)methyl)ethanamine (5jaa)

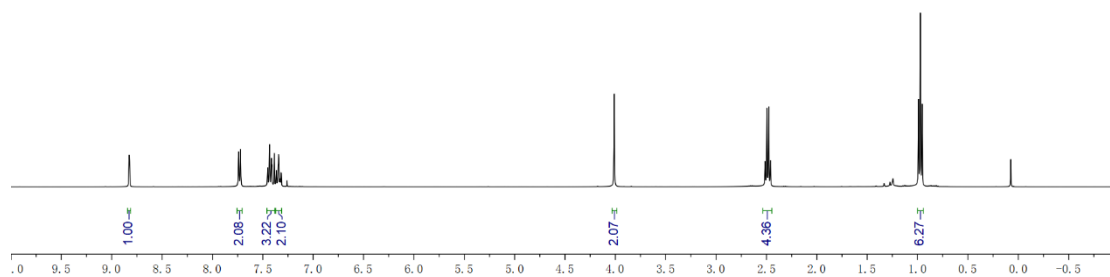

145.00  
143.33  
134.07  
132.02  
130.93  
128.76  
128.35  
127.74  
118.03  
117.44  
74.20  
47.27  
46.38  
11.54

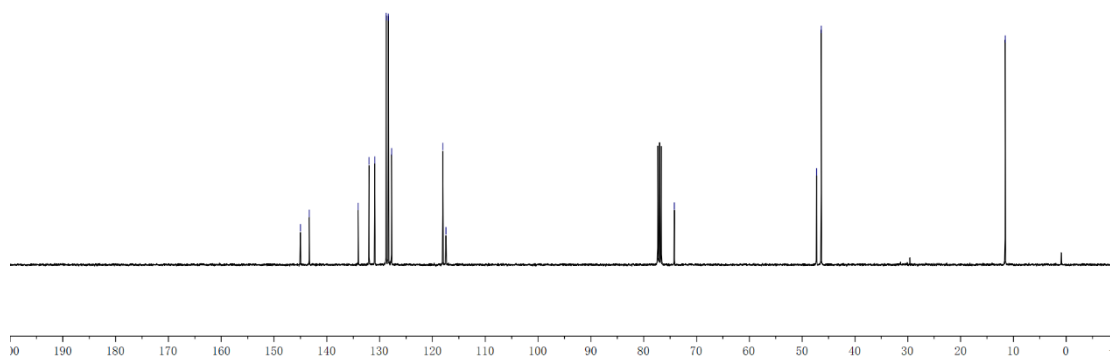

*N*-ethyl-*N*-((2-phenyl-6-(trifluoromethyl)imidazo[1,2-*a*]pyridin-3-yl)methyl)ethanamine (5kaa)

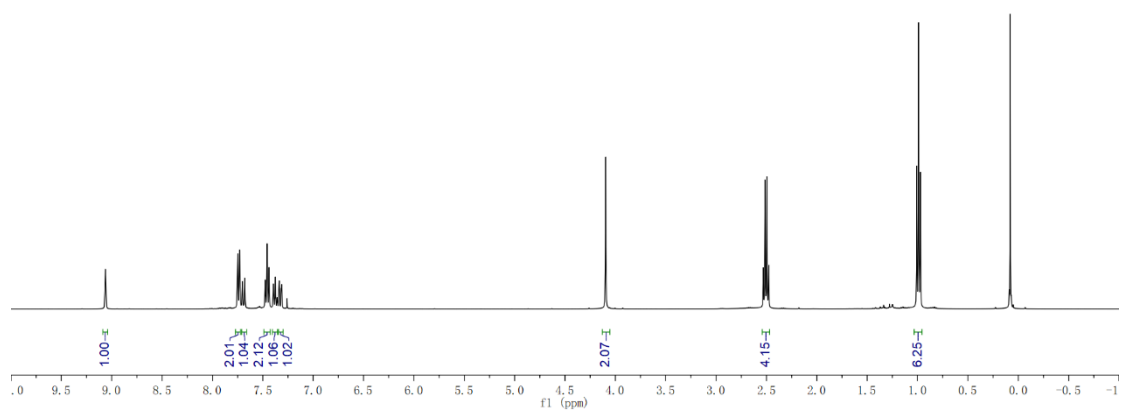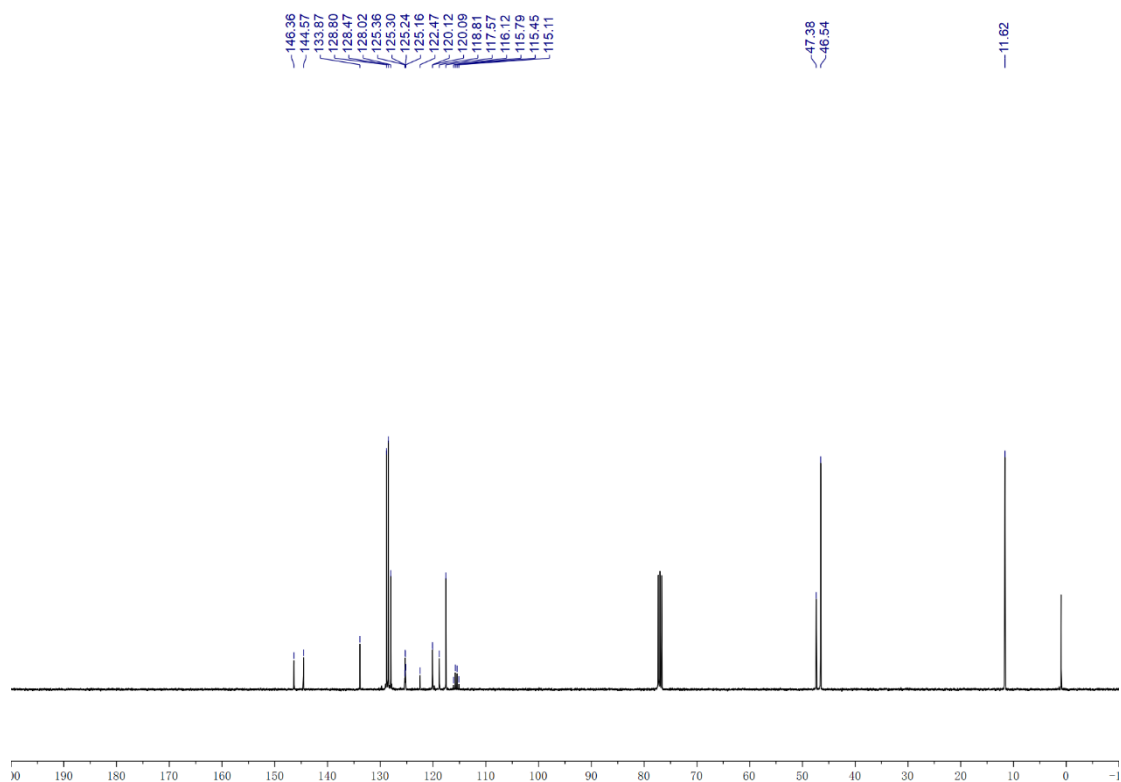

*N*-ethyl-*N*-((6-phenylimidazo[2,1-*b*]thiazol-5-yl)methyl)ethanamine (51aa)

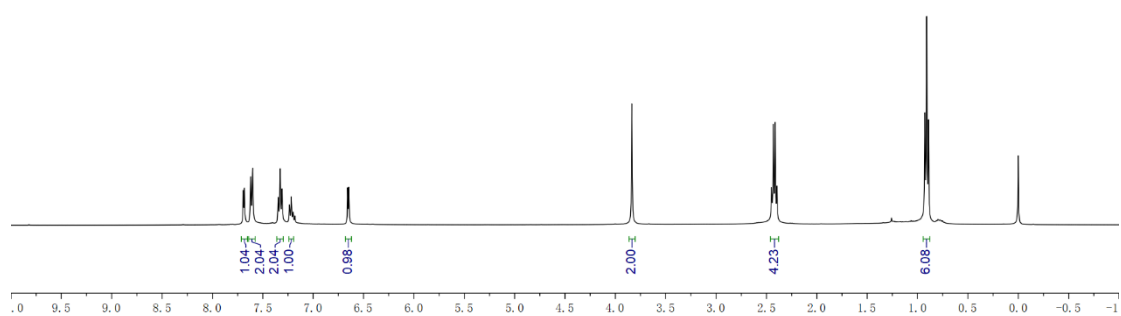

148.69, 145.13, 134.79, 128.27, 127.86, 126.86, 120.09, 119.44, 111.14, 48.14, 46.52, 11.72

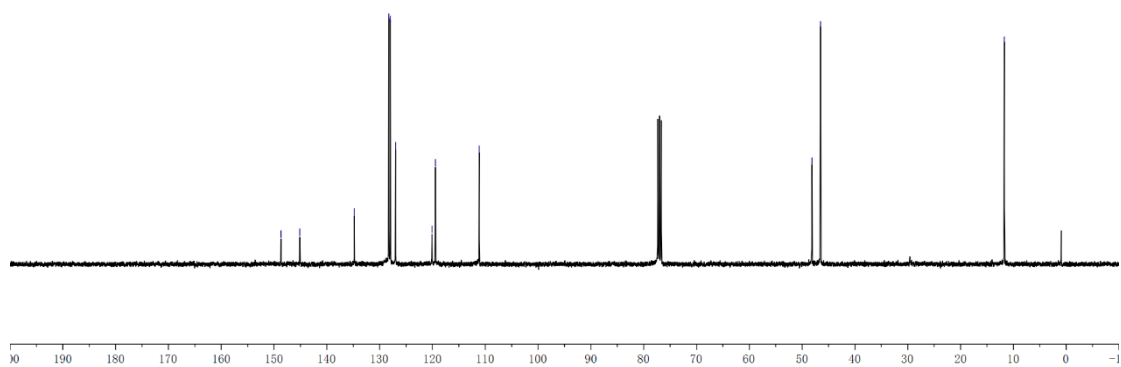

*N*-((2-phenylimidazo[1,2-*a*]pyridin-3-yl)methyl)-*N*-propylpropan-1-amine (5aab)

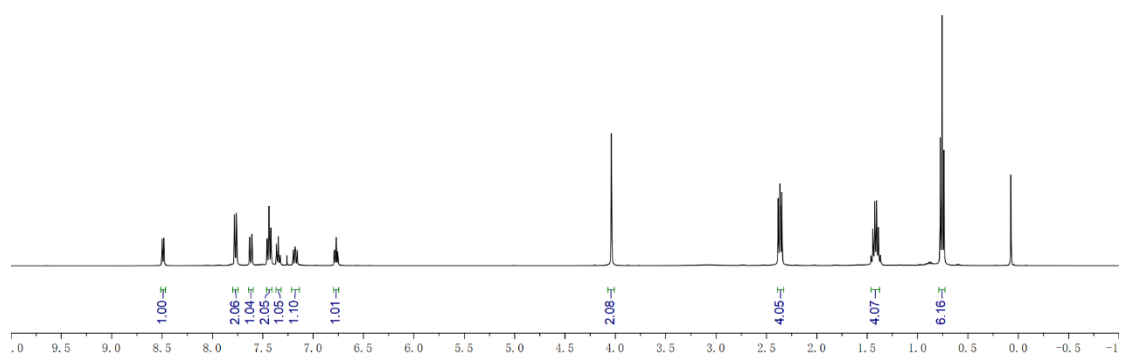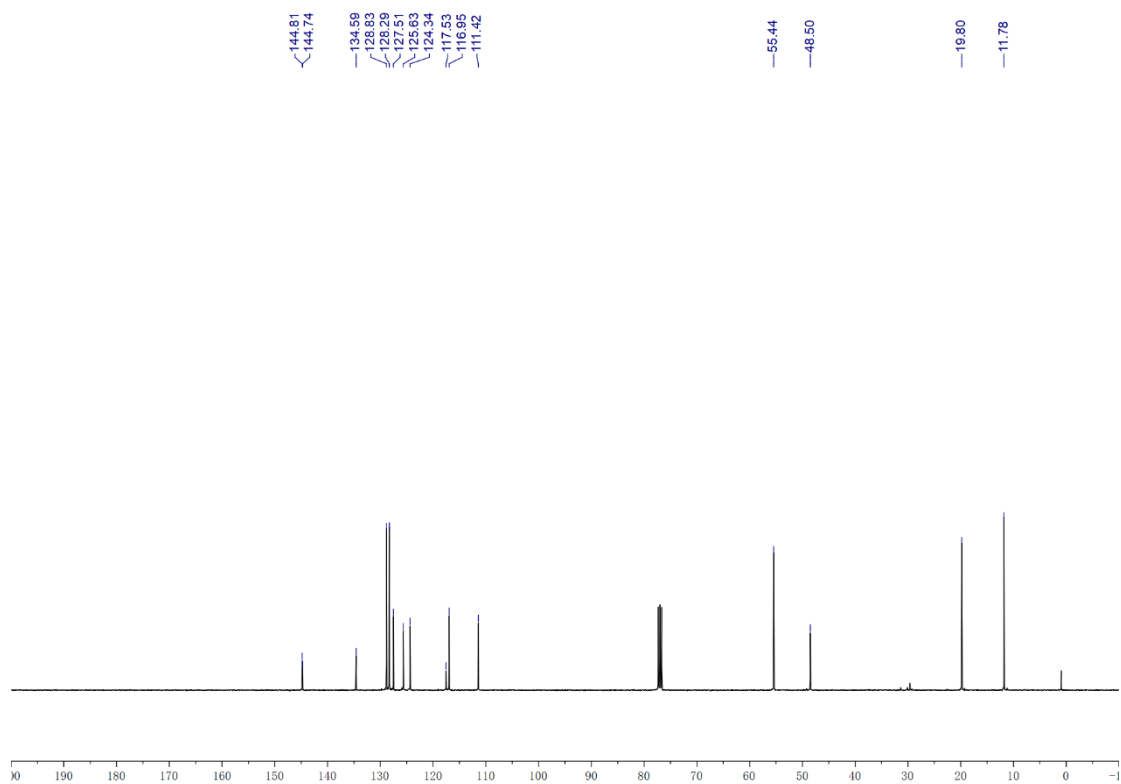



*N*-methyl-*N*-((2-phenylimidazo[1,2-*a*]pyridin-3-yl)methyl)propan-1-amine (5aac)

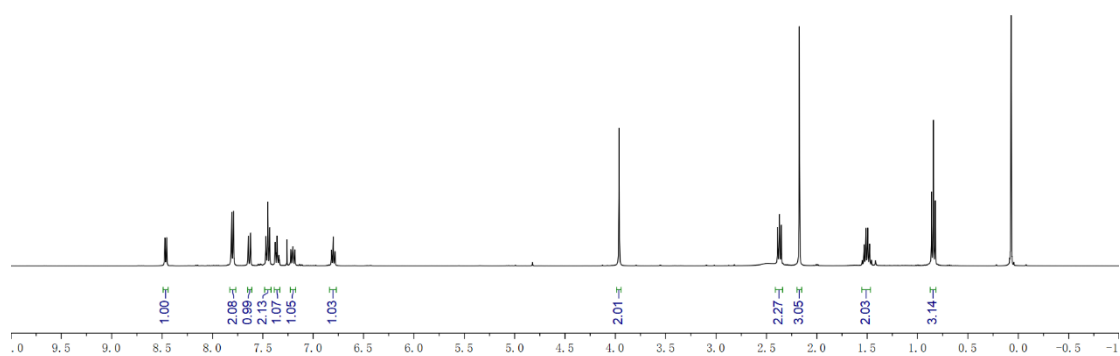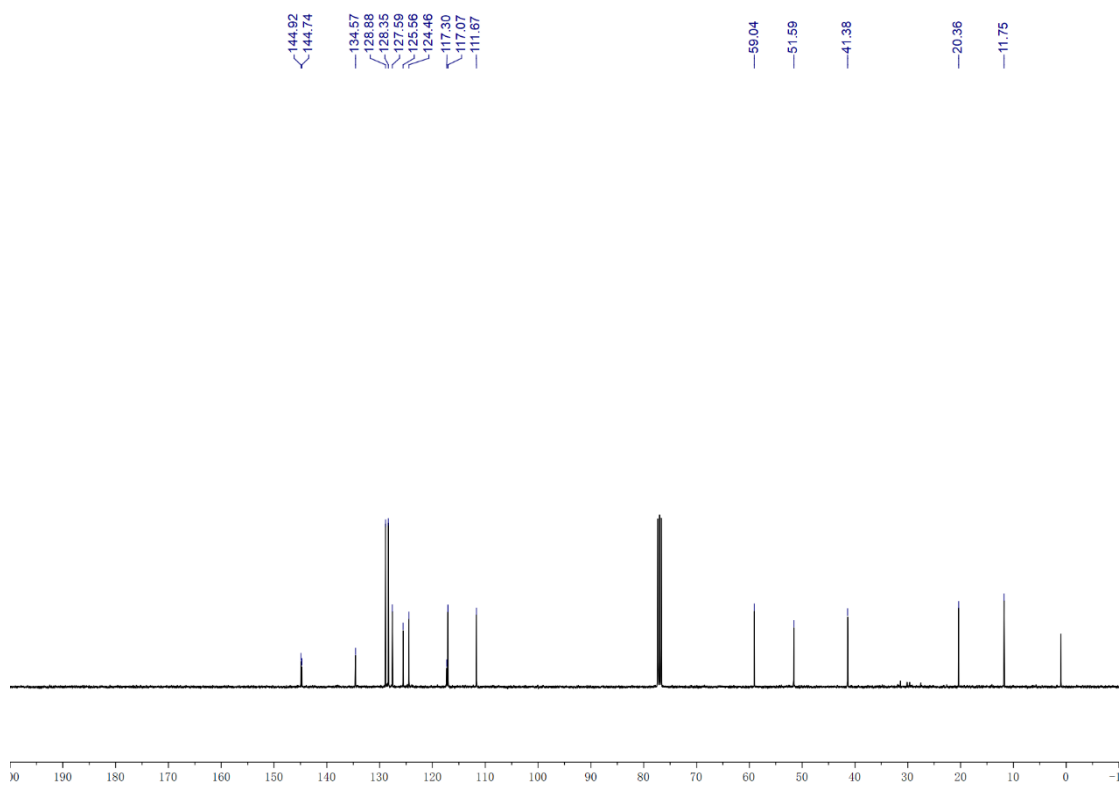

3-(methyl((2-phenylimidazo[1,2-a]pyridin-3-yl)methyl)amino)propanenitrile (5aad)

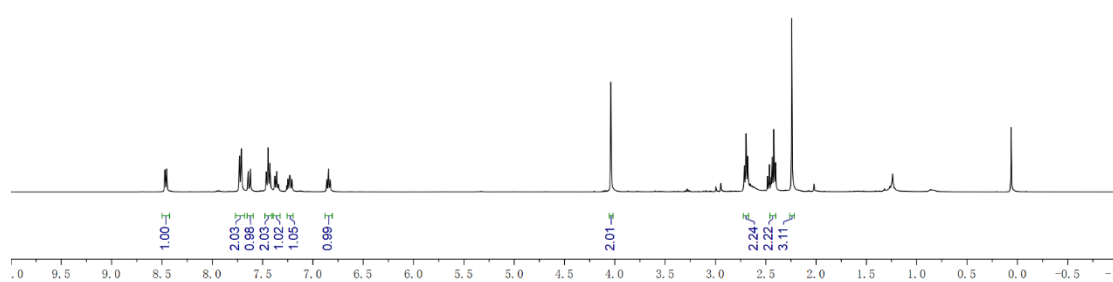

145.05  
134.17  
128.75  
128.36  
127.70  
125.52  
124.84  
118.46  
116.96  
115.93  
111.96

52.39  
51.76  
51.05  
40.76

16.24

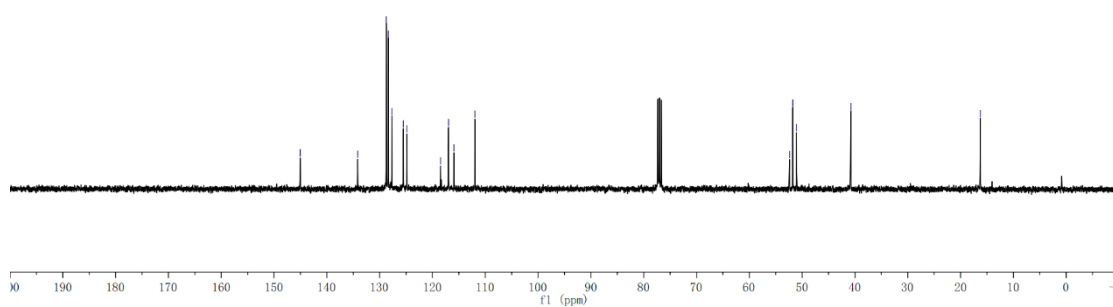

*N*-((2-phenylimidazo[1,2-*a*]pyridin-3-yl)methyl)butan-1-amine (5a<sub>ae</sub>)

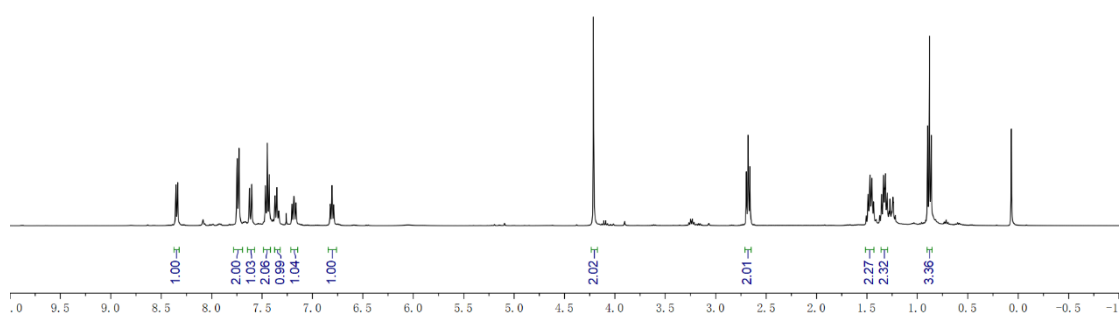

144.92  
143.76  
134.43  
128.47  
128.42  
127.59  
124.80  
124.40  
118.40  
117.13  
111.82

49.13  
42.92  
31.88  
20.32  
13.83

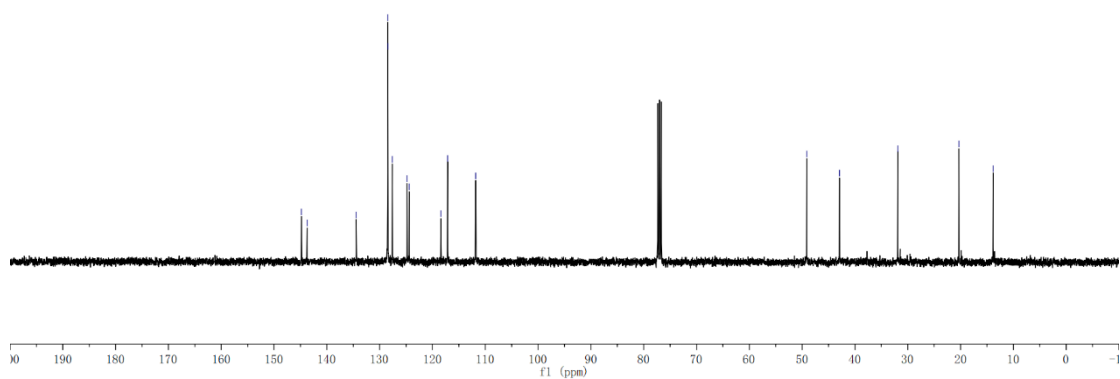

*N*-((2-phenylimidazo[1,2-*a*]pyridin-3-yl)methyl)octan-1-amine (5aaf)

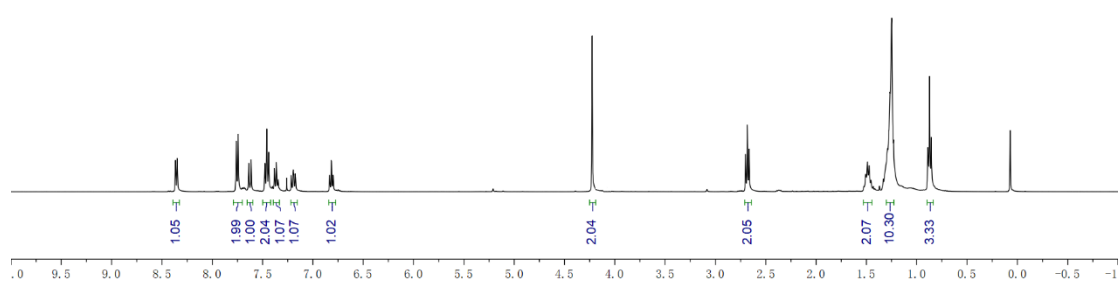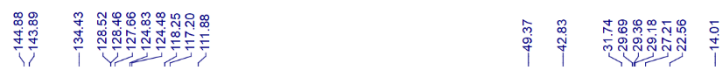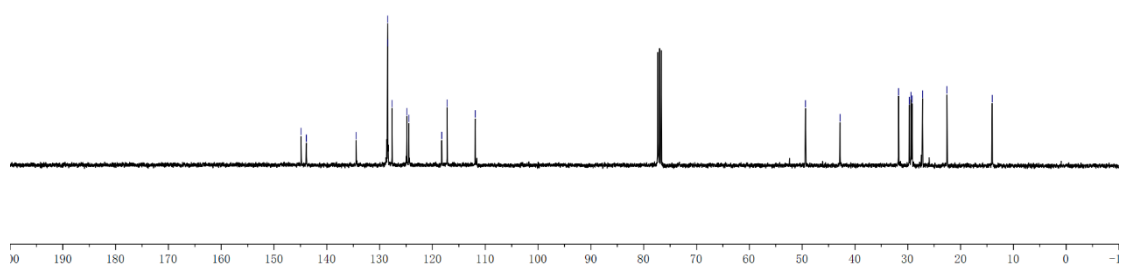

*N*-benzyl-1-(2-phenylimidazo[1,2-*a*]pyridin-3-yl)methanamine (5aag)

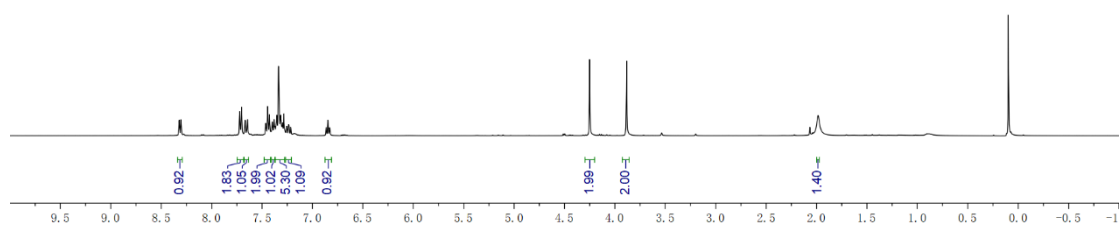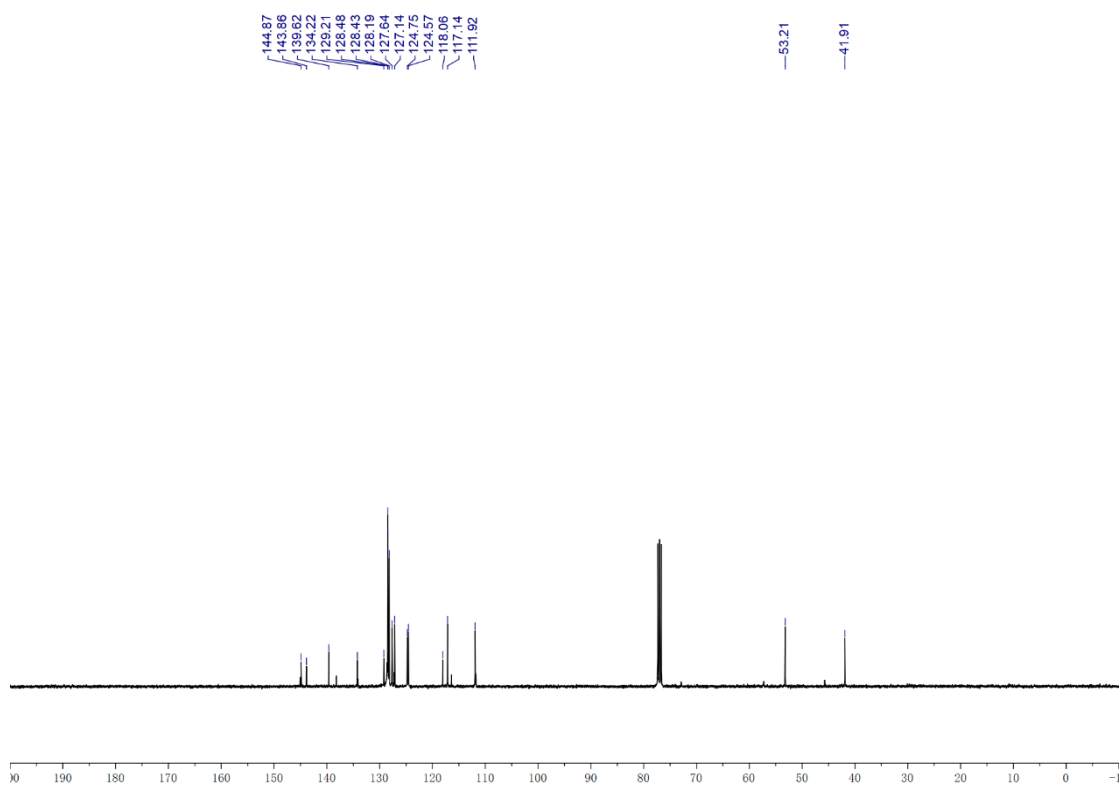

*2-phenyl-3-(pyrrolidin-1-ylmethyl)imidazo[1,2-a]pyridine (5aah)*

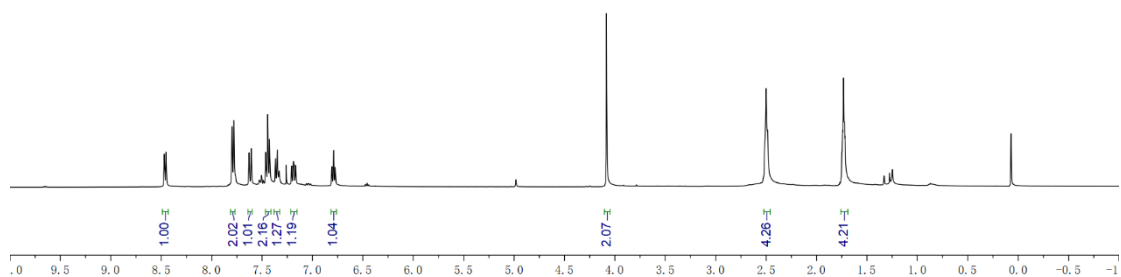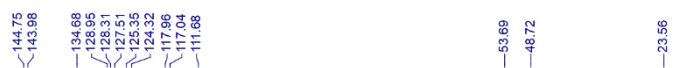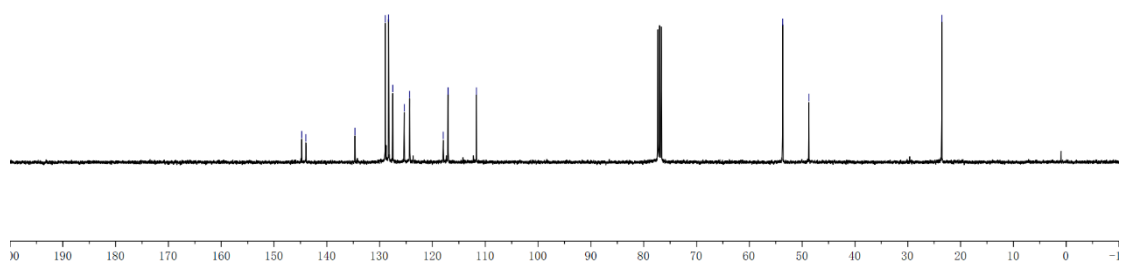

*2-phenyl-3-(piperidin-1-ylmethyl)imidazo[1,2-a]pyridine (5aai)*

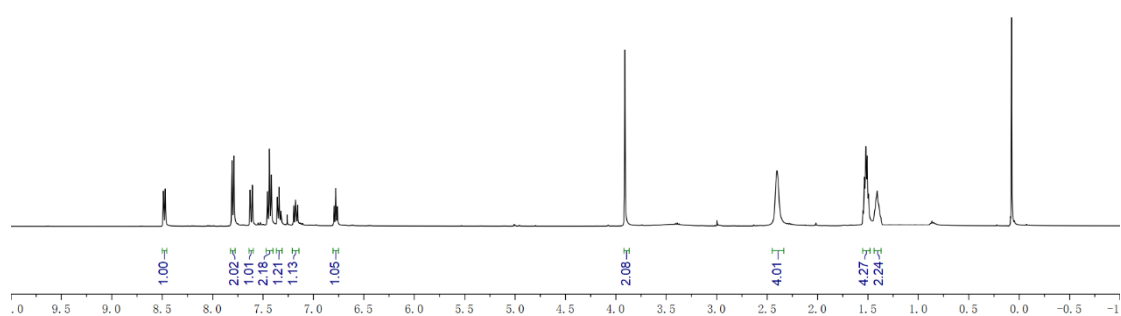

144.86  
144.88  
134.51  
128.81  
128.28  
127.51  
125.58  
124.37  
116.92  
116.76  
111.59

54.06  
52.31

25.86  
24.21

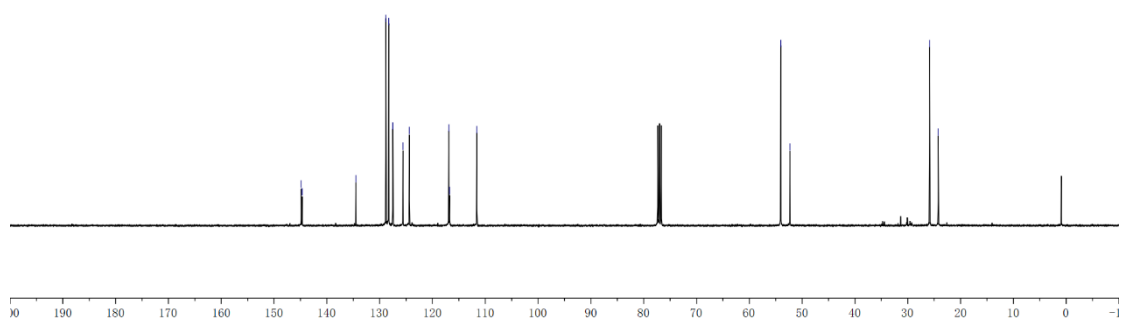

**4-((2-phenylimidazo[1,2-a]pyridin-3-yl)methyl)morpholine (5aaj)**

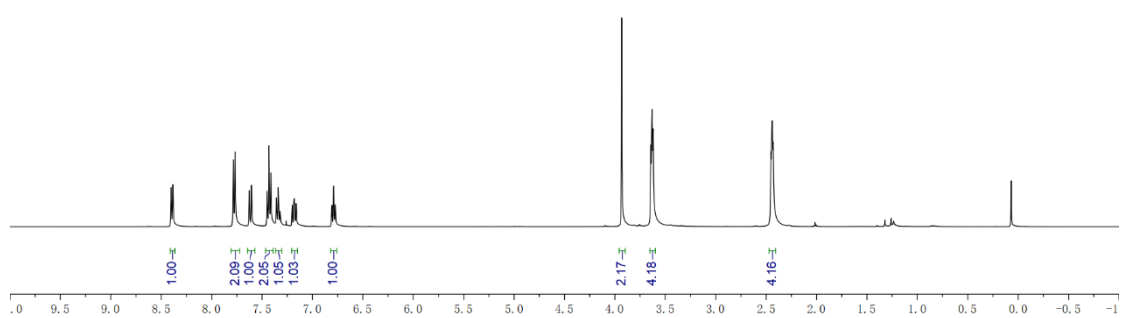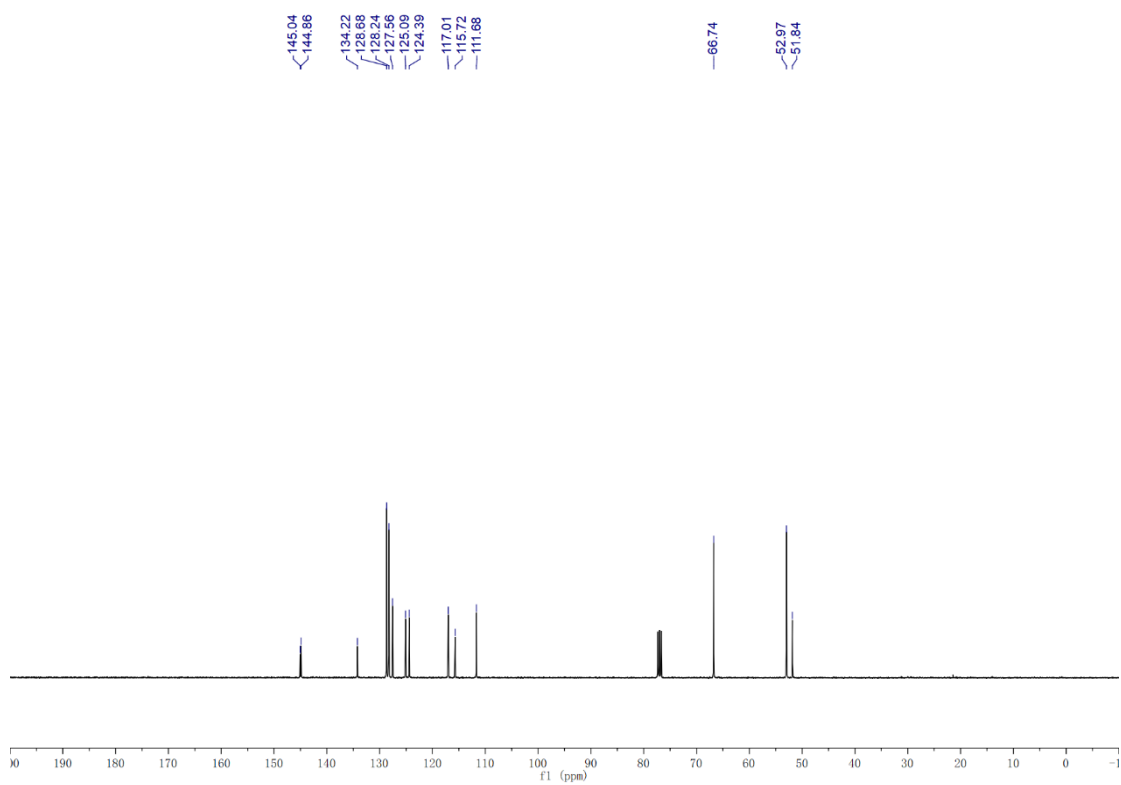



*N*-ethyl-*N*-((2-phenylimidazo[1,2-*a*]pyridin-3-yl)methyl-*d*<sub>2</sub>)ethanamine (D-5aaa)

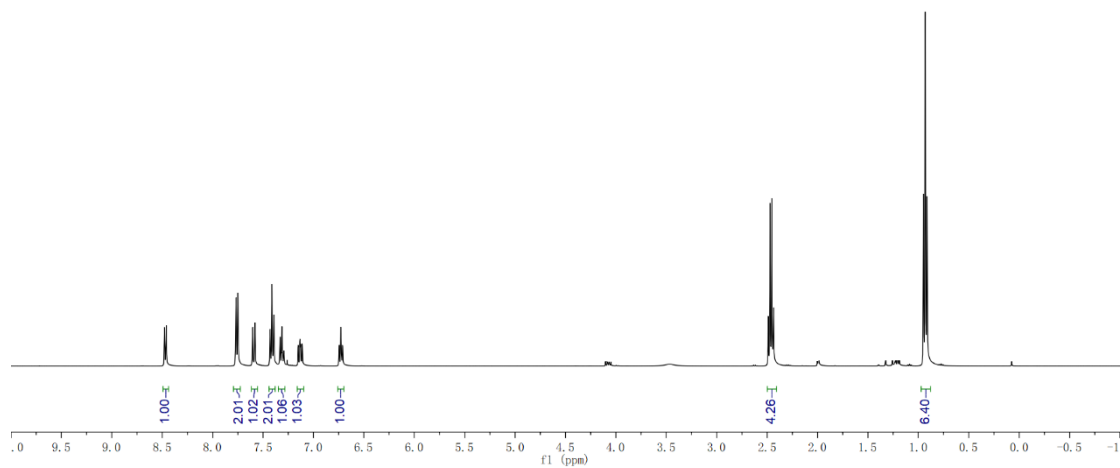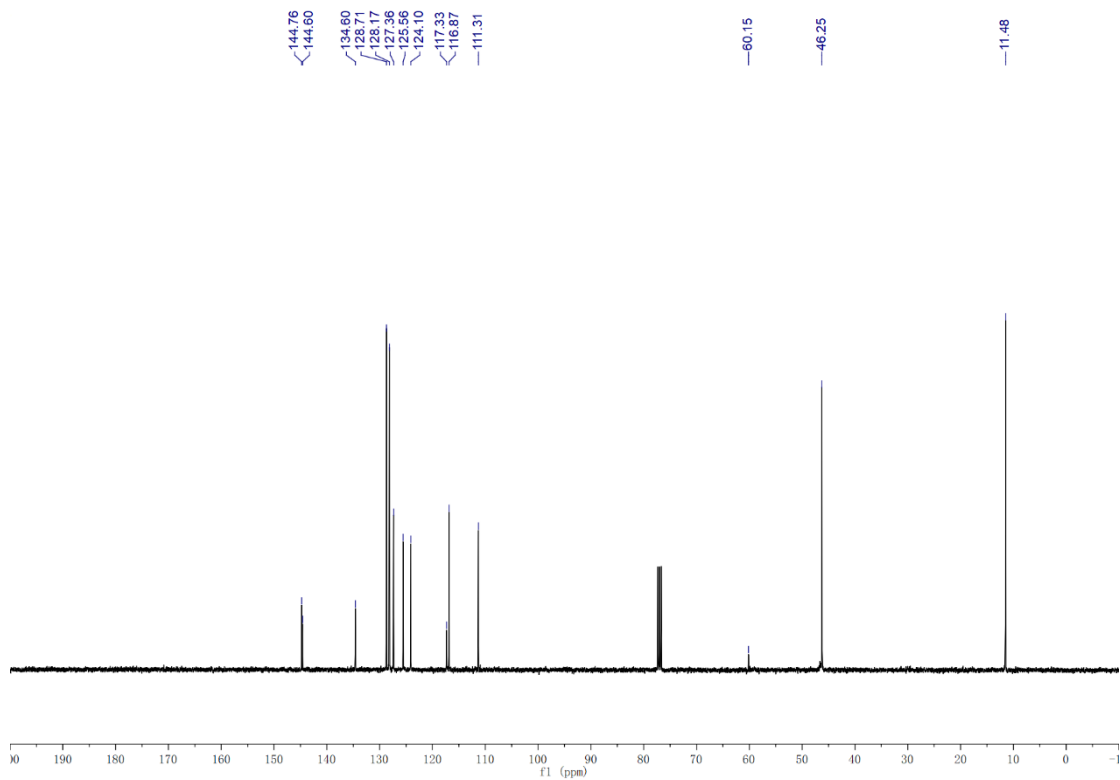

Supplement: d1gc01017d1.pdf [file d1gc01017d1.pdf]
